# Supplementary material for: Global Medicinal Use of Bats: A Systematic Literature and Social Media Review
Source: MDPI journal article supplement (doi:10.3390/d14030179), 2022-02-28
Supplement: s1 [file s1]

## Supplementary Materials

### Listing S1: Results of the Quantitative Scientific Literature Search (n = 198).

1. Abd Rabou, A.F.N. How is the COVID-19 outbreak affecting wildlife around the world? *Open Journal of Ecology* 2020, 10, 497-517. doi: 10.4236/oje.2020.108032.
2. Akem, E.S.; Pemunta, N.V. The bat meat chain and perceptions of the risk of contracting Ebola in the Mount Cameroon region. *BMC Public Health* 2020, 20, 1-10. doi:10.1186/s12889-020-08460-8.
3. Alviola, P.A.; Duya, M.R.; Alvarez, J.; Fidelino, J.; Gatan-Balbas, M.; Pedregosa, M.; Veluz, M.J.; Jakosalem, P.G.; Tanalgo, K. *Cheiromeles parvidens*. *The IUCN Red List of Threatened Species*. Available online: <https://dx.doi.org/10.2305/IUCN.UK.2019-3.RLTS.T19750A22002909>. (accessed on 14 October 2020).
4. Andrianaivoarivelo, R.; Ramilijaona, O.; Andriafidison, D. *Rousettus madagascariensis* Grandidier 1929 feeding on *Dimnocarpus longan* in Madagascar. *African Bat Conservation News* 2007, 11, 3-4.
5. Andrianaivoarivelo, R.; Andriafidison, D.; Razafimanahaka, J. *Rousettus madagascariensis*. *The IUCN Red List of Threatened Species*. <https://dx.doi.org/10.2305/IUCN.UK.2019-3.RLTS.T19750A22002909>. (accessed on 14 October 2020).
6. Aul, B.; Vijayakumar, S. P. *Bats of Nicobar--distribution and conservation status*. Final Technical Report submitted to the BP Conservation Programme, Cambridge, UK, 2003, 1-49.
7. Aul, B.; Bates, P.; Harrison, D.; Marimuthu, G. Diversity, distribution and status of bats on the Andaman and Nicobar Islands, India. *Oryx* 2014, 48, 204-212. doi:10.1017/S0030605312000646.
8. Aziz, S.A.; Olival, K.J.; Bumrungsri, S.; Richards, G.C.; Racey, P.A. The conflict between Pteropodid bats and fruit growers: species, legislation and mitigation. In *Bats In the Anthropocene: Conservation of Bats in a Changing World*; Voigt, C.C., Kingston, T. S Eds.; Springer, Cham, 2016, 377-426. doi:10.1007/978-3-319-25220-9\_13.
9. Aziz, S.A.; Clements, G.R.; Giam, X.; Forget, P.M.; Campos-Arceiz, A. coexistence and conflict between the island flying fox (*Pteropus hypomelanus*) and humans on Tioman Island, Peninsular Malaysia. *Human Ecology* 2017, 45, 377-389. doi:10.1007/s10745-017-9905-6.
10. Baeten, B.; Van Cakenberghe, V.; De Vree, F. An annotated inventory of a collection of bats from Rwanda. *Revue de Zoologie Africaine* 1984, 98, 183-196.
11. Bai, Y.; Osinubi, M.O.; Osikowicz, L.; McKee, C.; Vora, N.M.; Rizzo, M.R.; Recuenco, S.; Davis, L.; Niezgoda, M.; Ehimiyein, A.M.; Kia G.S. Human exposure to novel *Bartonella* species from contact with fruit bats. *Emerging Infectious Diseases* 2018, 24, 2317-2323. doi:10.3201/eid2412.181204.
12. Bailey, C.; Hilser, H.; Siwi, Y.; Lawe, Z.; Waterman, J.; Loffeld, T.; Sampson, H.; Tasirin, J.; Melfi, V.; Bowkett, A. Trends in the bushmeat market trade in North Sulawesi and conservation implications. *Animal Conservation* 2021, 25, 4-14. doi:10.1111/acv.12723.
13. Barrière, P.; Nicolas, V.; Oduro, L.K. Rapid survey of the small mammals of Ajenjua Bepo and Mamang River forest reserves, Ghana. In *A Rapid Biodiversity Assessment of the Ajenjua Bepo and Mamang River Forest Reserves, Ghana*. Conservation International: Arlington, VA, USA, 200954-57. doi: 10.1896/054.050.0114.
14. Bates, P.; Francis, C.; Gumal, M.; Bumrungsri, S.; Walston, J.; Heaney, L.; Mildenstein, T. *Pteropus vampyrus*. The IUCN Red List of Threatened Species. Available online: <https://dx.doi.org/10.2305/IUCN.UK.2008.RLTS.T18766A8593657>. (accessed on 14 October 2020).
15. Baudel, H.; De Nys, H.; Mpoudi Ngole, E.; Peeters, M.; Desclaux, A. Understanding Ebola virus and other zoonotic transmission risks through human-bat contacts: exploratory study on knowledge, attitudes and practices in Southern Cameroon. *Zoonoses and Public Health* 2019, 66, 288-295. doi:10.1111/zph.12563.
16. Bergmans, W.; Rozendaal, F.G. Notes on collections of fruit bats from Sulawesi and some off-lying islands (Mammalia, Megachiroptera). *Zoologische Verhandelingen* 1988, 248, 1-74.

17. Bergmans, W. Taxonomy and biogeography of African fruit bats (Mammalia, Megachiroptera). 4. The genus *Rousettus* Gray, 1821. *Beaufortia* 1994, 44, 79-126.
18. Bergmans, W. Notes on distribution and taxonomy of Australasian Bats. I. *Pteropodinae* and *Nyctimeninae* (Mammalia, Megachiroptera, Pteropodidae). *Beaufortia* 2001, 51, 119-152.
19. Bhattacharjee, J.; Dutta, B.K.; Bhattacharjee, P.C.; Singha, H.; Deb, P.; Dutta, H.; Hussain, M.M. Student perceptions of, and attitudes toward, bats in Barak Valley, Assam, India. *Anthrozoös* 2018, 31, 411-422. doi:10.1080/08927936.2019.1673063.
20. Birungi, D.; Tumwine, G.; Kato, C.D.; Ssekamatte, T.; Ocaido, M.; Majalija, S. Knowledge, Perceptions and effects of Ebola virus disease outbreak on the pig value chain in the agro-pastoralist district of Luwero, Central Uganda. *BMC Infectious Diseases* 2021, 21, 1-9. doi:10.1186/s12879-021-06337-8.
21. Bonaccorso, F.; Helgen, K.; Allison, A.; Wiles, G. *Pteropus tokudae*. The IUCN Red List of Threatened Species. Available online: <http://dx.doi.org/10.2305/IUCN.UK.2008.RLTS.T18763A8585073>. (accessed on 14 October 2020).
22. Borenstein, A.R.; Mortimer, J.A.; Schofield, E.; Wu, Y.; Salmon, D.P.; Gamst, A.; Olichney, J.; Thal, L.J.; Silbert, L.; Kaye, J.; Craig, U.L. Cycad exposure and risk of dementia, MCI, and PDC in the Chamorro population of Guam. *Neurology* 2007, 68, 1764-1771. doi:10.1212/01.wnl.0000262027.31623.b2.
23. Bourgarel, M.; Pfukenyi, D.M.; Boué, V.; Talignani, L.; Chiweshe, N.; Diop, F.; Caron, A.; Matope, G.; Missé, D.; Liégeois, F. Circulation of *Alphacoronavirus*, *Betacoronavirus* and *Paramyxovirus* in *Hipposideros* bat species in Zimbabwe. *Infection, Genetics and Evolution* 2018, 58, 253-257. doi:10.1016/j.meegid.2018.01.007.
24. Bowen-Jones, E.; Abrutat, D.; Markham, B.; Bowe, S. Flying foxes on Choiseul (Solomon Islands)—the need for conservation action. *Oryx* 1997, 31, 209-217. doi:10.1046/j.1365-3008.1997.d01-13.x.
25. Brooke, A.P.; Solek, C.; Tualaulelei, A. Roosting behavior of colonial and solitary flying foxes in American Samoa (Chiroptera: Pteropodidae). *Biotropica*, 2000, 32, 338-350. doi:10.1111/j.1744-7429.2000.tb00477.x.
26. Brooke, A.P. Population status and behaviours of the Samoan flying fox (*Pteropus samoensis*) on Tutuila Island, American Samoa. *Journal of Zoology* 2001, 254, 309-319. doi:10.1017/S0952836901000814.
27. Brooke, A.P.; Tschapka, M. Threats from overhunting to the flying fox, *Pteropus tonganus*, (Chiroptera: Pteropodidae) on Niue island, South Pacific Ocean. *Biological Conservation* 2002, 103, 343-348. doi:10.1016/S0006-3207(01)00145-8.
28. Buden, D.W.; Helgen, K.M.; Wiles, G.J. Taxonomy, distribution, and natural history of flying foxes (Chiroptera, Pteropodidae) in the Mortlock Islands and Chuuk State, Caroline Islands. *ZooKeys* 2013, 345, 97-135. doi:10.3897/zookeys.345.5840.
29. Cabauatan, J. G.; Ramos, M. T.; Taggug, J. B.; Callueng, A. M.; Tumaliuan, S.S.; Assessment of faunal diversity on selected caves of the Northern Sierra Madre Natural Park (NSMNP), Northern Cagayan Valley, Philippines. *International Journal of Agricultural Technology* 2014, 10, 631-649.
30. Cardiff, S.G.; Ratrimomanarivo, F.H.; Rembert, G.; Goodman, S.M. Hunting, disturbance and roost persistence of bats in caves at Ankarana, northern Madagascar. *African Journal of Ecology* 2009, 47, 640-649. doi:10.1111/j.1365-2028.2008.01015.x.
31. Carter, E. Sub-Report III. Unpublished Report. The Pemba Flying Fox Conservation Project, Cambridge, UK, 2005.
32. Carvalho, M.; Rego, F.; Palmeirim, J.M.; Fa, J.E. Wild meat consumption on São Tomé Island, West Africa: implications for conservation and local livelihoods. *Ecology and Society* 2015, 20, 693-703. doi:10.5751/ES-07831-200327.
33. Cayunda, I.E.B.; Ibanez, J.C.; Bastian, S., Jr. Roosting behavior and roost site characterization of *Pteropus vampyrus* in Malagos Watershed, Davao City. *Agham Mindanaw* 2004, 2, 61-72.
34. Chaber, A.L.; Armstrong, K.N.; Wiantoro, S.; Xerri, V.; Caraguel, C.; Boardman, W.S.; Nielsen, T.D. Bat e-commerce: insights into the extent and potential implications of this dark trade. *Frontiers in Veterinary Science* 2021, 8, 1-10. doi:10.3389/fvets.2021.651304.

35. Chaibes, A.; Duengkae, P.; Wacharapluesadee, S.; Pongpattananurak, N.; Olival, K.J.; Hemachudha, T. Assessing the distribution, roosting site characteristics, and population of *Pteropus lylei* in Thailand. *Raffles Bulletin of Zoology* 2017, 65, 670-680.
36. Churchill, S.; Draper, R.; Marais, E. Cave utilization by Namibian bats: population, microclimate and roost selection. *South African Journal of Wildlife Research* 1997, 27, 44-50.
37. Clements, R.; Sodhi, N.S.; Schilthuizen, M.; Ng, P.K. Limestone karsts of Southeast Asia: imperiled arks of biodiversity. *Bioscience* 2006, 56, 733-742.
38. Cousins, J.A.; Compton, S.G. The Tongan flying fox *Pteropus tonganus*: status, public attitudes and conservation in the Cook Islands. *Oryx* 2005, 39, 196-203. doi:10.1017/S003060530500044X.
39. Craig, P.; Trail, P.; Morrell, T.E. The decline of fruit bats in American Samoa due to hurricanes and overhunting. *Biological Conservation* 1994, 69, 261-266. doi:10.1016/0006-3207(94)90425-1.
40. Csorba, G.; Bumrungsri, S.; Francis, C.; Bates, P.; Ong, P.; Gumal, M.; Kingston, T.; Heaney, L.; Balet, D.S.; Molur, S.; Srinivasulu, C. *Chaerephon plicatus*. The IUCN Red List of Threatened Species. Available online: <https://dx.doi.org/10.2305/IUCN.UK.2020-2.RLTS.T4316A22018444>. (accessed on 14 October 2020).
41. Dell, B.; Masembe, C.; Gerhold, R.; Willcox, A.; Okafor, C.; Souza, M. Species misidentification in local markets: discrepancies between reporting and molecular identification of bushmeat species in northern Uganda. *One Health* 2021, 13, 1-6. doi:10.1016/j.onehlt.2021.100251.
42. Douangboubpha, B.; Bumrungsri, S.; Soisook, P.; Murray, S.W.; Puechmaille, S.J.; Satsook, C.; Bu, S.S.H.; Harrison, D.L.; Bates, P.J. A taxonomic review of *Hipposideros halophyllus*, with additional information on *H. ater* and *H. cineraceus* (Chiroptera: Hipposideridae) from Thailand and Myanmar. *Acta Chiropterologica* 2010, 12, 29-50. doi:10.3161/150811010X504572.
43. Dovih, P. Can traditional bat hunts cause disease outbreaks in India? *Economic and Political Weekly* 2015, 50, 13-16.
44. Duonamou, L.; Konate, A.; Djossou, S.D.; Mensah, G.A.; Xu, J.; Humle, T. Consumer perceptions and reported wild and domestic meat and fish consumption behavior during the Ebola epidemic in Guinea, West Africa. *PeerJ* 2020, 8, 1-24. doi:10.7717/peerj.9229.
45. Dwyer, P.D. The price of protein: five hundred hours of hunting in the New Guinea Highlands. *Oceania* 1974, 44, 278-293.
46. Dwyer, P.D. Notes on *Dobsonia moluccensis* (Chiroptera) in the New Guinea Highlands. *Mammalia* 1975, 39, 113-118. doi:10.1515/mamm.1975.39.1.113.
47. Entwistle, A. Status and distribution of the Pemba flying fox *Pteropus voeltzkowi*. *Oryx* 1997, 31, 135-142. doi:10.1046/j.1365-3008.1997.d01-7.x.
48. Entwistle, A.C.; Juma, J. *Pteropus voeltzkowi*. The IUCN Red List of Threatened Species. Available online: <http://dx.doi.org/10.2305/IUCN.UK.2016-1.RLTS.T18768A22089205>. (accessed on 14 October 2020).
49. Epstein, J.H.; Olival, K.J.; Pulliam, J.R.; Smith, C.; Westrum, J.; Hughes, T.; Dobson, A.P.; Zubaid, A.; Rahman, S.A.; Basir, M.M. *Pteropus vampyrus*, a hunted migratory species with a multinational home-range and a need for regional management. *Journal of Applied Ecology* 2009, 46, 991-1002. doi:10.1111/j.1365-2664.2009.01699.x.
50. Esselstyn, J.A.; Amar, A.; Janeke, D. Impact of post-typhoon hunting on Mariana fruit bats (*Pteropus mariannus*). *Pacific Science* 2006, 60, 531-539. doi:10.1353/psc.2006.0027.
51. Esselstyn, J.A. A new species of stripe-faced fruit bat (Chiroptera: Pteropodidae: *Styloctenium*) from the Philippines. *Journal of Mammalogy* 2007, 88, 951-958. doi:10.1644/06-MAMM-A-294R.1.
52. Euren, J.; Bangura, J.; Gbakima, A.; Sinah, M.; Yonda, S.; Lange, C.E.; McIver, D.J.; LeBreton, M.; Wolking, D.; Monagin, C.G.; Bird, B.; Saylor, K.; Human interactions with bat populations in Bombali, Sierra Leone. *EcoHealth* 2020, 17, 292-301. doi:10.1007/s10393-020-01502-y.

53. Evans, T.S.; Tutaryebwa, L.; Gilardi, K.V.; Barry, P.A.; Marzi, A.; Eberhardt, M.; Ssebide, B.; Cranfield, M.R.; Mugisha, O.; Mugisha, E. Kellermann, S.; Mazet, J.A.K.; Johnson, C.K. Suspected exposure to filoviruses among people contacting wildlife in southwestern Uganda. *The Journal of Infectious Diseases* 2018, 218, S277-S286. doi:10.1093/infdis/jiy251.
54. Fahr, J.; Djossa, B.A.; Vierhaus, H. Rapid assessment of bats (Chiroptera) in Déré, Diécké and Mt. Béro classified forests, Southeastern Guinea; including a review of the distribution of bats in Guinée Forestière. In *Rapid Biological Assessment of Three Classified Forests in Southeastern Guinea/Évaluation Biologique Rapide de Trois Forêt Classées du Sud-est de la Guinée*; Wright, E.E., McCullough, J., Alonso L.E., Diallo, M.S., Eds.; Conservation International: 2006; 40, 168-247.
55. Falanruw, M.V. On the status, reproductive biology and management of fruit bats of Yap. *Micronesica* 1988, 21, 39-51.
56. Fenton, M.B.; Mubareka, S.; Tsang, S.M.; Simmons, N.B.; Becker, D.J. COVID-19 and threats to bats. *FACETS* 2020, 5, 349-352. doi:10.1139/facets-2020-0028.
57. Fernández-Llamazares, Á.; López-Baucells, A.; Rocha, R.; Andriamitandrina, S.F.; Andriatafika, Z.E.; Burgas, D.; Temba, E.M.; Torrent, L.; Cabeza, M. Are sacred caves still safe havens for the endemic bats of Madagascar? *Oryx* 2018, 52, 271-275. doi:10.1017/S0030605317001648.
58. Fisher, D.; Tasker, E. Natural history of the New Georgia monkey-faced bat *Pteralopex* sp. nov. from the Solomon Islands. *Pacific Conservation Biology* 1997, 3, 134-142. doi:10.1071/PC970134.
59. Flannery, T.F. *Mammals of the South-West Pacific & Moluccan Islands*; Cornell University Press: Ithica, NY, USA, 1995.
60. Friant, S.; Paige, S.B.; Goldberg, T.L. Drivers of bushmeat hunting and perceptions of zoonoses in Nigerian hunting communities. *PLoS Neglected Tropical Diseases* 2015, 9, 1-16. doi:10.1371/journal.pntd.0003792.
61. Fujita, M.S.; Tuttle, M.D. Flying foxes (Chiroptera: Pteropodidae): threatened animals of key ecological and economic importance. *Conservation Biology* 1991, 5, 455-463. doi:10.1111/j.1523-1739.1991.tb00352.x.
62. Furey, N.; Görföl, T.; Francis, C.; Bates, P.; Csorba, G.; Tu, V. *Hipposideros scutinares*. The IUCN Red List of Threatened Species. <https://dx.doi.org/10.2305/IUCN.UK.2019-3.RLTS.T136586A22000133>. (accessed on 14 October 2020).
63. Gbogbo, F.; Daniels, J.K. Trade in wildlife for traditional medicine in Ghana: therapeutic values, zoonoses considerations, and implications for biodiversity conservation. *Human Dimensions of Wildlife* 2019, 24, 296-300. doi:10.1080/10871209.2019.1605637.
64. Gbogbo, F.; Kyei, M.O. Knowledge, perceptions and attitude of a community living around a colony of straw-coloured fruit bats (*Eidolon helvum*) in Ghana after Ebola virus disease outbreak in West Africa. *Zoonoses and Public Health* 2017, 64, 628-635. doi:10.1111/zph.12357.
65. Golden, C.D.; Comaroff, J. The human health and conservation relevance of food taboos in northeastern Madagascar. *Ecology and Society* 2015, 20, 1-10. doi:10.5751/ES-07590-200242.
66. Goodman, S.M., Ratrimomanarivo, F.H., Ranivo, J., Cardiff, S.G. The hunting of Microchiropteran bats in different portions of Madagascar. *African Bat Conservation News* 2008, 16, 4-7.
67. Goodman, S.M. Hunting of Microchiroptera in south-western Madagascar. *Oryx* 2006, 40, 225-228. doi:10.1017/S0030605306000354.
68. Graham, G.L. Conservation and subsistence harvesting of Pacific Island flying foxes. In *Pacific Island Flying Foxes: Proceedings of an International Conservation Conference*. Hawaii, USA. 1-2 February 1990; 46-49.
69. Harrison, M.E.; Cheyne, S.M.; Darma, F.; Ribowo, D.A.; Limin, S.H.; Struebig, M.J. Hunting of flying foxes and perception of disease risk in Indonesian Borneo. *Biological Conservation* 2011, 144, 2441-2449.
70. Hayman, D.T.; Peel, A.J. Can survival analyses detect hunting pressure in a highly connected species? Lessons from straw-coloured fruit bats. *Biological Conservation* 2016, 200, 131-139. doi:10.1016/j.biocon.2016.06.003.
71. Heaney, L.R.; Heideman, P.D. Philippine fruit bats: endangered and extinct. *Bats* 1987, 5, 3-5.

72. Heaney, L.R.; Utzurrum, R.C.B. A review of the conservation status of Philippine land mammals. *Association of Systematic Biologists of the Philippines Communications* 1991, 3, 1-13.
73. Heaney, L.R. A synopsis of the mammalian fauna of the Philippine Islands. *Fieldiana Zoology* 1998, 88, 1-61. doi:10.5962/bhl.title.3419.
74. Helgen, K.M. Systematics of the Pacific monkey-faced bats (Chiroptera: Pteropodidae), with a new species of *Pteralopex* and a new Fijian genus. *Systematics and Biodiversity* 2005, 3, 433-453. doi:10.1017/S1477200005001702.
75. Horigan, V.; Gale, P.; Kosmider, R.D.; Minnis, C.; Snary, E.L.; Breed, A.C.; Simons, R.R. Application of a quantitative entry assessment model to compare the relative risk of incursion of zoonotic bat-borne viruses into European Union member states. *Microbial Risk Analysis* 2017, 7, 8-28. doi:10.1016/j.mran.2017.09.002.
76. Hutson, A.M., Kingston, T., James, D., Lumsden, L., Molur, S. & Srinivasulu, C. *Pteropus melanotus*. The IUCN Red List of Threatened Species 2008: Available online: <https://dx.doi.org/10.2305/IUCN.UK.2021-3.RLTS.T18740A22082634>. (accessed on 8 October 2020).
77. Ibouroi, M.T.; Cheha, A.; Astruc, G.; Dhurham, S.A.O.; Besnard, A. A habitat suitability analysis at multi-spatial scale of two sympatric flying fox species reveals the urgent need for conservation action. *Biodiversity and Conservation* 2018, 27, 2395-2423. doi:10.1007/s10531-018-1544-8.
78. Ince, P.; Codd, G.A. Return of the cycad hypothesis—does the amyotrophic lateral sclerosis/parkinsonism dementia complex (ALS/PDC) of Guam have new implications for global health? *Neuropathology and Applied Neurobiology* 2005, 31, 345-353. doi:10.1111/j.1365-2990.2005.00686.x.
79. Jenkins, R.K.; Kofoky, A.F.; Russ, J.M.; Andriafidison, D.; Siemers, B.M.; Randrianadrianina, F.; Mbohoahy, T.; Rahaingondrahety, V.N.; Racey, P.A. Ecology and conservation of bats in the Southern Anosy Region. In *Biodiversity, Ecology and Conservation of Littoral Ecosystems in Southeastern Madagascar, Tolagnaro (Fort Dauphin)*. Ganzhorn, J.U., Goodman S.M, and Vincelette, M., Eds. Smithsonian Institution, Washington DC, USA, 2007a; pp.209-222.
80. Jenkins, R.K.; Racey, P.A.; Andriafidison, D.; Razafindrakoto, N.; Razafimahatratra, E.; Rabearivelo, A.; Ratsimandresy, Z.; Andrianandrasana, R.H.; Razafimanahaka, H.J. Not rare, but threatened: the endemic Madagascar flying fox *Pteropus rufus* in a fragmented landscape. *Oryx* 2007b, 41, 263-271. doi:10.1017/S0030605307001883.
81. Jenkins, R.K.; Racey, P.A. Bats as bushmeat in Madagascar. *Madagascar Conservation & Development* 2008, 3, 22-30. doi:10.4314/mcd.v3i1.44132.
82. Jugli, S.; Chakravorty, J.; Meyer-Rochow, V.B. Zootherapeutic uses of animals and their parts: an important element of the traditional knowledge of the Tangsa and Wancho of eastern Arunachal Pradesh, North-East India. *Environment, Development and Sustainability* 2020, 22, 4699-4734. doi:10.1007/s10668-019-00404-6.
83. Kamins, A.O.; Restif, O.; Ntiamoa-Baidu, Y.; Suu-Ire, R.; Hayman, D.T.; Cunningham, A.A.; Wood, J.L.; Rowcliffe, J.M. Uncovering the fruit bat bushmeat commodity chain and the true extent of fruit bat hunting in Ghana, West Africa. *Biological Conservation* 2011, 144, 3000-3008. doi:10.1016/j.biocon.2011.09.003.
84. Kamins, A.O.; Baker, K.; Restif, O.; Cunningham, A.; Wood, J.L. Emerging risks from bat bushmeat in West Africa. In *Trends in Game Meat Hygiene: From Forest to Fork*. Paulson, P., Bauer, A., Smulders, F.J.M., Eds.; Wageningen Academic Publishers, Wageningen, The Netherlands, 2014, pp. 239-240. ISBN: 978-90-8686-238-2.
85. Kamins, A.O.; Rowcliffe, J.M.; Ntiamoa-Baidu, Y.; Cunningham, A.A.; Wood, J.L.; Restif, O. Characteristics and risk perceptions of Ghanaians potentially exposed to bat-borne zoonoses through bushmeat. *EcoHealth* 2015, 12, 104-120. doi:10.1007/s10393-014-0977-0.
86. Kasso, M.; Balakrishnan, M. Ecological and economic importance of bats (Order Chiroptera). *International Scholarly Research Notices* 2013, 1-9. doi:10.1155/2013/187415.
87. Kingston, T. Research priorities for bat conservation in Southeast Asia: A consensus approach. *Biodiversity and Conservation* 2010, 19, 471-484. doi:10.1007/s10531-008-9458-5.

88. Krivek, G.; Florens, F.B.V.; Baider, C.; Seegobin, V.O.; Haugaasen, T. Invasive alien plant control improves foraging habitat quality of a threatened island flying fox. *Journal for Nature Conservation* 2020, 54, 1-7. doi:10.1016/j.jnc.2020.125805.
89. Kompanje, E.J.; Moeliker, C.W. Some fruit bats from remote Moluccan and West-Papuan islands, with the description of a new subspecies of *Macroglossus minimus* (Megachiroptera: Pteropodidae). *Deinsea* 2001, 8, 143-168.
90. Krueger, S.; O'Daniel, D. Observations of Mariana fruit bats on Tinian. *Micronesia* 1999, 31, 367-371.
91. Lane, D.J.; Kingston, T.; Lee, B. P. H. Dramatic decline in bat species richness in Singapore, with implications for Southeast Asia. *Biological Conservation* 2006, 131, 584-593. doi:10.1016/j.biocon.2006.03.005.
92. Latinne, A.; Saputro, S.; Kalengkongan, J.; Kowel, C.L.; Gaghiwu, L.; Ransaleleh, T.A.; Nangoy, M.J.; Wahyuni, I.; Kusumaningrum, T.; Safari, D.; Feferholtz, Y.; Hongying, Li.; Hagan, E.; Miller, M.; Francisco, L.; Daszak, P.; Olival, K.J.; Pamungkas, J. Characterizing and quantifying the wildlife trade network in Sulawesi, Indonesia. *Global Ecology and Conservation* 2020, 21, 1-18. doi:10.1016/j.gecco.2019.e00887.
93. Lavery, T.M.; Teel, T.L.; Gawusab, A.A.; Berger, J. Listening to bats: Namibian pastoralists' perspectives, stories, and experiences. *Journal of Ethnobiology* 2021, 41, 70-86. doi:10.2993/0278-0771-41.1.70.
94. Lavery, T.H. *Pteropus rennelli*. The IUCN Red List of Threatened Species. Available online: <http://dx.doi.org/10.2305/IUCN.UK.2017-2.RLTS.T136685A22038028>. (accessed on 9 December 2019).
95. Lavery, T.H.; Fasi, J. Buying through your teeth: Traditional currency and conservation of flying foxes *Pteropus spp.* in Solomon Islands. *Oryx* 2019, 53, 505-512. doi:10.1017/S0030605317001004.
96. Lavery, T.H.; Leary, T.N.; Shaw, C.; Tahy, M.; Posala, C.; Pierce, R. Ecology and conservation of bats in Temotu Province, Solomon Islands and Torba Province, Vanuatu. *Pacific Conservation Biology* 2020, 27, 27-38. doi:10.1071/PC20035.
97. Lawson, E.T.; Ohemeng, F.; Ayivor, J.; Leach, M.; Waldman, L.; Ntiemo-Baidu, Y. Understanding framings and perceptions of spillover: preventing future outbreaks of bat-borne zoonoses. *Disaster Prevention and Management* 2017, 26, 396-411. doi:10.1108/DPM-04-2016-0082.
98. Leach, M.; Bett, B.; Said, M.; Bukachi, S.; Sang, R.; Anderson, N.; Machila, N.; Kuleszo, J.; Schaten, K.; Dzingirai, V.; Mangwanya, L.; Ntiemo-Baidu, Y.; Lawson, E.; Amponsah-Mensah, K.; Moses, L.M.; Wilkinson, A.; Grant, D.S.; Koninga, J. Local disease–ecosystem–livelihood dynamics: reflections from comparative case studies in Africa. *Philosophical Transactions of the Royal Society B* 2017, 372, 1-18. doi:10.1098/rstb.2016.0163.
99. Lee, R.J.; Gorog, A.J.; Dwiyahreni, A.; Siwu, S.; Riley, J.; Alexander, H.; Paoli, G.D.; Ramono, W. Wildlife trade and implications for law enforcement in Indonesia: a case study from North Sulawesi. *Biological Conservation* 2005, 123, 477-488. doi:10.1016/j.biocon.2005.01.009.
100. Lemke, T.O., Status of the Marianas fruit bat (*Pteropus Mariannus*) in the Northern Mariana Islands north of Saipan. In *Pacific Island Flying Foxes: Proceedings of an International Conservation Conference*. Hawaii, USA. 1-2 February 1990; 68-74.
101. Leroy, E.M.; Epelboin, A.; Mondonge, V.; Pourrut, X.; Gonzalez, J.P.; Muyembe-Tamfum, J.J.; Formenty, P. Human Ebola outbreak resulting from direct exposure to fruit bats in Luebo, Democratic Republic of Congo, 2007. *Vector-Borne and Zoonotic Diseases* 2009, 9, 723-728. doi:10.1089/vbz.2008.0167.
102. Lizarro, D.; Galarza, M.I.; Aguirre, L.F. Tráfico y comercio de murciélagos en Bolivia. *Revista Boliviana de Ecología y Conservación Ambiental* 2010, 27, 63-75.
103. Luiselli, L.; Hema, E.M.; Segniagbeto, G.H.; Ouattara, V.; Eniang, E.A.; Di Vittorio, M.; Amadi, N.; Parfait, G.; Pacini, N.; Akani, G.C.; Sirima, D.; Guenda, W.; Fakae, B.B.; Dendi, D.; Fa, J.E. Understanding the influence of non-wealth factors in determining bushmeat consumption: results from four West African countries. *Acta Chiropterologica* 2019, 94, 47-56. doi:10.1016/j.actao.2017.10.002.
104. Mahmood-Ul-Hassan, M.; Gulraiz, T.L.; Rana, S.A.; Javid, A. The diet of Indian flying-foxes (*Pteropus giganteus*) in urban habitats of Pakistan. *Acta Chiropterologica* 2010, 12, 341-347. doi:10.3161/150811010X537927.

105. Maryanto, I.; Yani, M. A new species of *Rousettus* (Chiroptera: Pteropodidae) from Lore Lindu, Central Sulawesi. *Mammal Study* 2003, 28, 111-120. doi:10.3106/mammalstudy.28.111.
106. Masy'ud, B.; Felayati, N.R.; Sunarminto, T. Local wisdom in animal conservation and animal use as medicine of Orang Rimba in Bukit Duabelas National Park, Jambi. *Journal Manajemen Hutan Tropika* 2020, 26, 72-72. doi:10.7226/jtfm.26.1.72.
107. McIver, D.J.; Silithammavong, S.; Theppangna, W.; Gillis, A.; Douangngeun, B.; Khammavong, K.; Singhalath, S.; Duong, V.; Buchy, P.; Olson, S.H.; Keats, L.; Fine, A.E.; Grotorex, Z.; Gilbert, M.; LaBreton, M.; Saylor, K.; Joly, D.O.; Rubin, E.M.; Lange, C.E. Coronavirus surveillance of wildlife in the Lao People's Democratic Republic detects viral RNA in rodents. *Archives of Virology* 2020, 165, 1869-1875. doi:10.1007/s00705-020-04683-7.
108. Meijaard, E.; Sheil, D.; Nasi, R.; Augeri, D.; Rosenbaum, B.; Iskandar, D.; Setyawati, T.; Lammertink, M.; Rachmatika, I.; Wong, A. and Soehartono, T. *Life after Logging: Reconciling Wildlife Conservation and Production Forestry in Indonesian Borneo*. CIFOR, Bogor, Indonesia 2005. <https://doi.org/10.17528/cifor/001663>.
109. Mickleburgh, S.P.; Hutson, A.M.; Racey, P.A. *Old World Fruit Bats. An Action Plan for their Conservation*. IUCN, Gland, Switzerland, 1992.
110. Mickleburgh, S.; Waylen, K.; Racey, P. Bats as bushmeat: A global review. *Oryx* 2009, 43, 217-234. doi:10.1017/S0030605308000938
111. Mildenstein, T.; Tanshi, I.; Racey, P.A. Exploitation of bats for bushmeat and medicine In *Bats In the Anthropocene: Conservation of Bats in a Changing World*; Voigt, C.C., Kingston, T. S Eds.; Springer, Cham, 2016, pp. 377-426, doi:10.1007/978-3-319-25220-9\_12.
112. Molur, S.; Marimuthu, G.; Srinivasulu, C.; Mistry, S.; Hutson, A.M.; Bates, P.J.J.; Walker, S.; Priya, K.P.; Priya, A.R.B. Status of South Asian Chiroptera: conservation assessment and management plan (CAMP) workshop report. *Zoo Outreach Organisation; CBSG South Asia; WILD*; Coimbatore, India, 2002.
113. Molur, S.; Molur, P. Indian flying fox roosts on Bengaluru-Madikeri road. *Bat Net Newsletter* 2007, 8, 34-36.
114. Monadjem, A., Cardiff, S.G., Rakotoarivelo, A.R., Jenkins, R.K.B.; Ratrimomanarivo, F.H. *Paremballonura atrata*. The IUCN Red List of Threatened Species. Available online: <http://dx.doi.org/10.2305/IUCN.UK.2017-2.RLTS.T7671A22135427>. (accessed 14 October 2020).
115. Morvan, A. Le virus, la chauve-souris et le totem. *Ethnographie des relations inter-espèces dans le contexte biosécuritaire australien. Anthropologie & Santé* 2021, 22, 1-20 doi:10.4000/anthropologiesante.6942.
116. Mulangu, S.; Borchert, M.; Paweska, J.; Tshomba, A.; Afoude, A.; Kulidri, A.; Swanepoel, R.; Muyembe-Tamfum, J.J.; Van der Stuyft, P. High prevalence of IgG antibodies to Ebola virus in the Efé pygmy population in the Watsa Region, Democratic Republic of the Congo. *BMC Infectious Diseases* 2016, 16, 1-6.
117. Nahar, N.; Asaduzzaman, M.; Mandal, U.K.; Rimi, N.A.; Gurley, E.S.; Rahman, M.; Garcia, F.; Zimicki, S.; Sultana, R.; Luby, S.P. Hunting bats for human consumption in Bangladesh. *EcoHealth* 2020, 17, 139-151. doi:10.1007/s10393-020-01468-x.
118. Neupane, K.R.; Basnet, K.; Katuwal, H.B. Plight of Indian flying fox (*Pteropus giganteus*) in lowlands of eastern Nepal. *World Journal of Zoology* 2016, 11, 81-85. doi: 10.5829/idosi.wjz.2016.11.2.10355.
119. Oedin, M.; Brescia, F.; Boissenin, M.; Vidal, E.; Cassan, J.J.; Hurlin, J.C.; Millon, A. Monitoring hunted species of cultural significance: estimates of trends, population sizes and harvesting rates of flying-fox (*Pteropus sp.*) in New Caledonia. *PLoS ONE* 2019, 14, 1-16. doi:10.1371/journal.pone.0224466.
120. Ohemeng, F.; Lawson, E.T.; Ayivor, J.; Leach, M.; Waldman, L.; Ntiemoa-Baidu, Y. Socio-cultural determinants of human-bat interactions in rural Ghana. *Anthrozoös* 2017, 30, 181-194. doi:10.1080/08927936.2017.1310984.
121. Ohemeng, F.; Ayivor, J.S.; Lawson, E.T.; Ntiemoa-Baidu, Y. Local classifications of fever and treatment sought among populations at risk of zoonotic diseases in Ghana. *PLoS ONE* 2018, 13, 1-14. doi:10.1371/journal.pone.0201526.

122. Oleksy, R.Z.; Ayady, C.L.; Tatayah, V.; Jones, C.; Howey, P.W.; Froidevaux, J.S.; Racey, P.A.; Jones, G. The movement ecology of the Mauritian flying fox (*Pteropus niger*): a long-term study using solar-powered GSM/GPS tags. *Movement Ecology* 2019, 7, 1-12. doi:10.1186/s40462-019-0156-6.
123. Oliveros, C.; Broad, G.; Pedregosa, M.; Espanola, C.; Reyes, M.A.; Garcia, H.; Gonzalez, J.C.T.; Bajarias, A., Jr.; An avifaunal survey of the Babuyan Islands, northern Philippines with notes on mammals, reptiles and amphibians. *Unpublished Expedition Report* 2004. Manila, Philippines.
124. Onibala, J.S.I.T.; Laatung, S. Bushmeat hunting in North Sulawesi and related conservation strategies (a case study at the Tangkoko Nature Reserve). In *Proceedings of the Mini Workshop Southeast Asia Germany Alumni Network*. Manado, Indonesia, 3-5 May 2007; 110-116.
125. Openshaw, J.J.; Hegde, S.; Sazzad, H.M.; Khan, S.U.; Hossain, M.J.; Epstein, J.H.; Daszak, P.; Gurley, E.S.; Luby, S.P. Bat hunting and bat-human interactions in Bangladeshi villages: implications for zoonotic disease transmission and bat conservation. *Transboundary and Emerging Diseases* 2017, 64, 1287-1293. doi:10.1111/tbed.12505.
126. Paguntalan, L.M.J.; Jakosalem, P.G. Conserving threatened and endemic fruit bats in isolated forest patches in Cebu with notes on new records and rediscoveries. *Silliman Journal* 2008, 48, 81-94.
127. Palmeirim, J.M.; Champion, A.; Naikatini, A.; Niukula, J.; Tuiwawa, M.; Fisher, M.; Yabaki-Gounder, M.; Thorsteinsdóttir, S.; Qalovaki, S.; Dunn, T. Distribution, status and conservation of the bats of the Fiji Islands. *Oryx* 2007, 41, 509-519. doi:10.1017/S0030605307004036.
128. Paunović, M. *Myotis capaccinii*. The IUCN Red List of Threatened Species. Available online: <http://dx.doi.org/10.2305/IUCN.UK.2016-2.RLTS.T14126A22054131>. (accessed on 9 December 2019).
129. Peel, A.J.; Sargan, D.R.; Baker, K.S.; Hayman, D.T.; Barr, J.A.; Cramer, G.; Suu-Ire, R.; Broder, C.C.; Lembo, T.; Wang, L.F. Continent-wide panmixia of an African fruit bat facilitates transmission of potentially zoonotic viruses. *Nature Communications* 2013, 4, 1-14. doi:10.1038/ncomms3770.
130. Peel, A.J.; Wood, J.L.; Baker, K.S.; Breed, A.C.; De Carvalho, A.; Fernández-Loras, A.; Gabrieli, H.S.; Gembu, G.C.; Kakengi, V.A.; Kaliba, P.M.; Kityo, R.M.; Lembo, T.; Mba, F.E.; Ramos, D.; Rodriguez-Prieto, I.; Suu-Ire, R.; Cunningham, A.A.; Hayman, D.S. How does Africa's most hunted bat vary across the continent? Population traits of the straw-coloured fruit bat (*Eidolon helvum*) and its interactions with humans. *Acta Chiropterologica* 2017, 19, 77-92. doi:10.3161/15081109ACC2017.19.1.006.
131. Petrovan, S.O.; Aldridge, D.C.; Bartlett, H.; Bladon, A.J.; Booth, H.; Broad, S.; Broom, D.M.; Burgess, N.D.; Cleaveland, S.; Cunningham, A.A.; Ferri, M.; Hinsley, A.; Hua, F.; Hughes, A.C.; Jones, K.; Kelly, M.; Mayes, G.; Radakovik, M.; Ugwu, C.A.; Uddin, N.; Verissimo, D.; Walzer, C.; White, T.B.; Wood, J.L.; Sutherland, W.J. Post COVID-19: a solution scan of options for preventing future zoonotic epidemics. *Biological Reviews* 2021, 96, 2694-2715. doi:10.17605/OSF.IO/5JX3G.
132. Phelps, K.; Jose, R.; Labonite, M.; Kingston, T. Assemblage and species threshold responses to environmental and disturbance gradients shape bat diversity in disturbed cave landscapes. *Diversity* 2018, 10, 1-10. doi:10.3390/d10030055.
133. Phelps, K.L.; Kingston, T. Environmental and biological context modulates the physiological stress response of bats to human disturbance. *Oecologia* 2018, 188, 41-52. doi: 10.1007/s00442-018-4179-2.
134. Pierson, E.D.; Rainey, W. E. The biology of the genus *Pteropus*. In *Pacific Island Flying Foxes: Proceedings of an International Conservation Conference*. Hawaii, USA. 1-2 February 1990; 1-17.
135. Pierson, E.D.; Elmqvist, T.; Rainey, W.E.; Cox, P.A. Effects of tropical cyclonic storms on flying fox populations on the South Pacific Islands of Samoa. *Conservation Biology* 1996, 10, 438-451.
136. Piraccini, R. *Myotis emarginatus*. The IUCN Red List of Threatened Species. Available online: <http://dx.doi.org/10.2305/IUCN.UK.2016-2.RLTS.T14129A22051191>. (accessed on 09 December 2019).
137. Ponce, L.; Kinoshita, R.; Nishiura, H. Exploring the human-animal interface of Ebola virus disease outbreaks. *Mathematical Biosciences and Engineering* 2019, 16, 3130-3143. doi:10.3934/mbe.2019155.

138. Racey, P.A.; Goodman, S.M.; Jenkins, R.K. The ecology and conservation of Malagasy bats. In *Island Bats: Evolution, Ecology, and Conservation*. Fleming, T.H., Racey, P.A., Eds. University of Chicago Press, Chicago, IL, USA, 2010; pp. 369-404.
139. Rahaingodrahety, V.N.; Andriafidison, D.; Ratsimbazafy, J.H.; Racey, P.A.; Jenkins, R.K. Three flying fox (Pteropodidae: *Pteropus rufus*) roosts, three conservation challenges in southeastern Madagascar. *Madagascar Conservation & Development* 2008, 3, 17-21. doi:10.4314/mcd.v3i1.44131.
140. Rahman, M.R. Biogeographical status of dusky fruit bat, *Penthetor lucasi* (Chiroptera: Pteropodidae) inferred to morphological and genetic analyses in Malaysia. Thesis, Universiti Malaysia Sarawak, Kota Samarahan, Malaysia, 2010.
141. Rahmatullah, M.; Ayman, U.; Akter, F.; Sarker, M.; Sifa, R.; Sarker, B.; Chyiti, H.N.; Jahan, F.I.; Chowdhury, M.H.; Chowdhury, S.A. Medicinal formulations of a Kanda tribal healer—a tribe on the verge of disappearance in Bangladesh. *African Journal of Traditional, Complementary and Alternative Medicines* 2013, 10, 213-222. doi:10.4314/ajtcam.v10i2.5.
142. Rakotoarivelo, A.; Randrianandrianina, F. A Chiropteran survey of the Lac Kinkony-Mahavavy area in western Madagascar. *African Bat Conservation News* 2007, 12, 2-5.
143. Rakotonandrasana, E.N.; Goodman, S.M. Bat inventories of the Madagascar offshore islands of Nosy Be, Nosy Komba and Ile Sainte-Marie. *African Bat Conservation News* 2007, 12, 6-10.
144. Randrianandrianina, F.H.; Racey, P.A.; Jenkins, R.K. Hunting and consumption of mammals and birds by people in urban areas of western Madagascar. *Oryx* 2010, 44, 411-415. doi:10.1017/S003060531000044X.
145. Raymundo, M.L.; Caballes, C.F. An insight into bat hunter behavior and perception with implications for the conservation of the critically endangered Philippine bare-backed fruit bat. *Journal of Ethnobiology* 2016, 36, 382-394. doi:10.2993/0278-0771-36.2.382.
146. Razafindrakoto, N. Etude comparative du régime alimentaire de *Pteropus rufus* Tiedemann, 1808 et de *Rousettus madagascariensis* Grandidier, 1928 (Megachiroptera: Pteropodidae) dans le district de Moramanga. Dissertation, Département de Biologie Animale, Université d'Antananarivo, Antananarivo, Madagascar, 2006.
147. Razanajatovo, N.H.; Nomenjanahary, L.A.; Wilkinson, D.A.; Razafimanahaka, J.H.; Goodman, S.M.; Jenkins, R.K.; Jones, J.P.; Heraud, J.M. Detection of new genetic variants of *Betacoronaviruses* in endemic frugivorous bats of Madagascar. *Virology Journal* 2015, 12, 1-8. doi:10.1186/s12985-015-0271-y.
148. Rego, K. M. D. C.; Zeppelini, C. G.; Lopez, L. C. S.; Alves, R. R. N. Assessing bat-human interactions around a protected area in northeastern Brazil. *Journal of Ethnobiology and Ethnomedicine* 2015, 11, 1-8. doi:10.1186/s13002-015-0058-7
149. Reuter, K.E.; Randell, H.; Wills, A.R.; Janvier, T.E.; Belalahy, T.R.; Sewall, B.J. Capture, Movement, trade, and consumption of mammals in Madagascar. *PloS ONE* 2016a, 11, 1-25. doi:10.1371/journal.pone.0150305.
150. Reuter, K.E.; Randell, H.; Wills, A.R.; Sewall, B.J. The consumption of wild meat in Madagascar: Drivers, popularity and food security. *Environmental Conservation* 2016b, 43, 273-283. doi:10.1017/S0376892916000059.
151. Riley, J. Mammals on the Sangihe and Talaud Islands, Indonesia, and the impact of hunting and habitat loss. *Oryx* 2002a, 36, 288-296. doi:10.1017/S0030605302000510.
152. Riley, J. The rediscovery of Talaud Islands flying fox, *Acerodon humilis*, Andersen, 1909, and notes on other fruit bats from the Sangihe and Talaud Islands, Indonesia (Mammalia: Chiroptera: Pteropodidae). *Faunistische Abhandlungen* 2002b, 22, 393-410.
153. Rimoin, A.W.; Alfonso, V.H.; Hoff, N.A.; Doshi, R.H.; Mulembakani, P.; Kisalu, N.K.; Muyembe, J.J.; Okitolonda, E.W.; Wright, L.L. Human exposure to wild animals in the Sankuru Province of the Democratic Republic of the Congo. *EcoHealth* 2017, 14, 552-563. doi: 10.1007/s10393-017-1262-9.
154. Robertson, K.; Lumlertdacha, B.; Franka, R.; Petersen, B.; Bhengsri, S.; Henchaichon, S.; Peruski, L.F.; Baggett, H.C.; Maloney, S.A.; Rupprecht, C.E. Rabies-related knowledge and practices among persons at risk of bat exposures in Thailand. *PLoS Neglected Tropical Diseases* 2011, 5, 1-7. Doi:10.1371/journal.pntd.0001054.

155. Rocha, R.; Fernández-Llamazares, Á.; López-Baucells, A.; Andriamitandrina, S.F.; Andriatafika, Z.E.; Temba, E.M.; Torrent, L.; Burgas, D.; Cabeza, M. Human-bat interactions in rural southwestern Madagascar through a biocultural lens. *Journal of Ethnobiology* 2021a, 41, 53-69.
156. Rocha, R.; López-Baucells, A.; Fernández-Llamazares, Á. Ethnobiology of bats: exploring human-bat inter-relationships in a rapidly changing world. *Journal of Ethnobiology* 2021b, 41, 3-17. doi:10.2993/0278-0771-41.1.3.
157. Sagot, M.; Chaverri, G. Effects of roost specialization on extinction risk in bats. *Conservation Biology* 2015, 29, 1666-1673. doi:10.1111/cobi.12546.
158. Saylor, K.E.; Mouiche, M.M.; Lucas, A.; McIver, D.J.; Matsida, A.; Clary, C.; Maptue, V.T.; Euren, J.D.; LeBreton, M.; Tamoufe, U. Market characteristics and zoonotic disease risk perception in Cameroon bushmeat markets. *Social Science & Medicine* 2021, 268, 1-10. doi:10.1016/j.socscimed.2020.113358.
159. Scanlon, A.; Brooke, A.; Wiles, G. *Pteropus samoensis*. The IUCN Red List of Threatened Species. Available online: <https://dx.doi.org/10.2305/IUCN.UK.2020-2.RLTS.T18757A22087415>. (accessed 14 October 2020).
160. Scheffers, B.R.; Corlett, R.T.; Diesmos, A.; Laurance, W.F. Local demand drives a bushmeat industry in a Philippine forest preserve. *Tropical Conservation Science* 2012, 5, 133-141. doi:10.1177/194008291200500203.
161. Sedlock, J.L.; Jose, R.P.; Vogt, J.M.; Paguntalan, L.M.J.; Cariño, A.B. A survey of bats in a karst landscape in the central Philippines. *Acta Chiropterologica* 2014, 16, 197-211.
162. Seehausen, O. The Pemba fruit bat—on the edge of extinction? *Oryx* 1991, 25, 110-112. doi:10.1017/S003060530003516X.
163. Sewall, B.J.; Granek, E.F.; Trewhella, W.J. The endemic Comoros Islands fruit bat *Rousettus obliviosus*: ecology, conservation, and Red List status. *Oryx* 2003, 37, 344-352. doi:10.1017/S0030605303000607.
164. Sewall, B.J.; Granek, E.F.; Moutui, M.; Trewhella, W.J.; Reason, P.F.; Rodríguez-Clark, K.M.; Saïd, I.; Carroll, J.B.; Masfield, W.; Toilibou, N.; Vély, M.; ben Mohadji, F.; Feistner, A.T.C.; Wells, S. Conservation action plan for Livingstone's flying fox. 2007. [https://sites.temple.edu/bjsewall/files/2016/05/Sewall\\_et\\_al\\_2007\\_Liv\\_Cons\\_Action\\_Plan\\_En.pdf](https://sites.temple.edu/bjsewall/files/2016/05/Sewall_et_al_2007_Liv_Cons_Action_Plan_En.pdf) (accessed 14 October 2020).
165. Shapiro, H.G.; Willcox, A.S.; Tate, M.; Willcox, E.V. Can farmers and bats co-exist? Farmer attitudes, knowledge, and experiences with bats in Belize. *Human–Wildlife Interactions* 2020, 14, 5-15.
166. Shapiro, H.G.; Willcox, A.S.; Ader, D.R.; Willcox, E.V. Attitudes towards and relationships with cave-roosting bats in northwest Cambodia. *Journal of Ethnobiology* 2021, 41, 87-104. doi:10.2993/0278-0771-41.1.87.
167. Sheherazade, Tsang, S.M. Quantifying the bat bushmeat trade in North Sulawesi, Indonesia, with suggestions for conservation action. *Global Ecology and Conservation* 2015, 3, 324-330. doi:10.1016/j.gecco.2015.01.003.
168. Sheherazade, Tsang, S.M. Roost of gray flying foxes (*Pteropus griseus*) in Indonesia and records of a new hunting threat. *Diversity* 2018, 10, 1-11. doi:10.3390/d10030102.
169. Shively, G.E. Poverty, technology, and wildlife hunting in Palawan. *Environmental Conservation* 1997, 24, 57-63. doi:10.1017/S0376892997000106.
170. Shoeman, C. *Rhinolophus mossambicus*. The IUCN Red List of Threatened Species. Available online: <https://dx.doi.org/10.2305/IUCN.UK.2017-2.RLTS.T64589126A64589338>. (accessed on 14 October 2020).
171. Siya, A.; Bazeyo, W.; Tuhebwe, D.; Tumwine, G.; Ezama, A.; Manirakiza, L.; Kugonza, D.R.; Rwego, I.B. Lowland grazing and Marburg virus disease (MVD) outbreak in Kween District, Eastern Uganda. *BMC Public Health* 2019, 19, 1-7. doi:10.1186/s12889-019-6477-y.
172. Smith, I.; Wang, L.F. Bats and their virome: an important source of emerging viruses capable of infecting humans. *Current Opinion in Virology* 2013, 3, 84-91. doi:10.1016/j.coviro.2012.11.006.
173. Stinson, D.W.; Glass, P.O.; Taisacan, E.M. Declines and trade in fruit bats on Siapan, Tinian, Aguijan, and Rota. In *Pacific Island Flying Foxes: Proceedings of an International Conservation Conference*. Hawaii, USA. 1-2 February 1990; pp. 61-67.

174. Struebig, M.J.; Christy, L.; Pio, D.; Meijaard, E. Bats of Borneo: diversity, distributions and representation in protected areas. *Biodiversity and Conservation* 2010, 19, 449-469. doi:10.1007/s10531-008-9482-5
175. Summers, M.; Bunsung, R.; Manasai, W. "Someday we will all learn anew through hands that love us": Protecting a key insular population of the Sulawesi fruit bat *Acerodon celebensis*. *Conservation Science and Practice* 2021, 3, 1-3. doi:10.1111/csp2.559.
176. Suwannarong, K.; Balthip, K.; Kanthawee, P.; Suwannarong, K.; Khiewkhern, S.; Lantican, C.; Ponlap, T.; Bupha, N.; Amonsin, A. Bats and belief: a sequential qualitative study in Thailand. *Heliyon* 2020a, 6, 1-9. doi:10.1016/j.heliyon.2020.e04208.
177. Suwannarong, K.; Chanabun, S.; Kanthawee, P.; Khiewkhern, S.; Boonyakawee, P.; Suwannarong, K.; Saengkul, C.; Buppa, N.; Amonsin, A. Risk factors for bat contact and consumption behaviors in Thailand; a quantitative study. *BMC Public Health* 2020b, 20, 1-13. doi:10.1186/s12889-020-08968-z.
178. Tanalgo, K.C.; Teves, R.D.; Salvaña, F.R.P.; Baleva, R.E.; Tabora, J.A.G. Human-bat interactions in caves of South Central Mindanao, Philippines. *Wildlife Biology in Practice* 2016, 12, 1-14. doi:10.2461/wbp.2016.12.2.
179. Thong, V.D.; Loi, D.N. *Tadarida latouchei*. The IUCN Red List of Threatened Species. Available online: <https://dx.doi.org/10.2305/IUCN.UK.2020-2.RLTS.T40036A22060323>. (accessed on 14 October 2020).
180. Trehwella, W.J.; Rodriguez-Clark, K.M.; Corp, N.; Entwistle, A.; Garrett, S.R.T.; Granek, E.; Lengel, K.L.; Raboude, M.J.; Reason, P.F.; Sewall, B.J. Environmental education as a component of multidisciplinary conservation programs: lessons from the conservation initiatives for critically endangered fruit bats in the Western Indian Ocean. *Conservation Biology* 2005, 19, 75-85. doi:10.1111/j.1523-1739.2005.00548.x.
181. Tsang, S.M.; Paguntalan, L. *Pteropus speciosus*. The IUCN Red List of Threatened Species. Available online: <https://dx.doi.org/10.2305/IUCN.UK.2020-2.RLTS.T18760A22087948>. (accessed on 14 October 2020).
182. Tsang, S.M.; Wiantoro, S.; Simmons, N.B. New records of flying foxes (Chiroptera: *Pteropus* sp.) from Seram, Indonesia, with notes on ecology and conservation status. *American Museum Novitates* 2015, 1-23. doi:10.1206/3842.1.
183. Van Cakenberghe, V.; Seamark, C.J. African Chiroptera Report 2014. AfricanBats NPC 2014, i – xix, 1 – 802.
184. Van Cakenberghe, V.; Seamark, C.J. African Chiroptera Report 2016. AfricanBats NPC 2016, i – xvii, 1 – 900.
185. Van Cakenberghe, V.; Seamark, C.J. African Chiroptera Report 2017. AfricanBats NPC 2017, i – xxi, 1–959.
186. Van Cakenberghe, V.; Seamark, C.J. African Chiroptera Report 2018. AfricanBats NPC 2018, i-xvi, 1-971.
187. Vanitharani, J.; Pearch, M.; Praba, L.J.; Annamalai, R. A review of the distribution and status of *Latidens salimalii* (Chiroptera: Pteropodidae) with new records from the Western Ghats, India. *Lutra* 2004, 47, 21-32.
188. Vora, N.M.; Osinubi, M.O.; Lora Davis, M.A.; Adedire, E.B.; Akpan, H.; Aman-Oloniyo, A.F.; Audu, S.W.; Blau, D.; Dankoli, R.S.; Ehimiyein, A.M.; Ellison, J.A.; Gbadevensun, Y.H.; Greenberg, L.; Haberling, D.; Hutson, C.; Idris, J.M.; Kia, G.S.N.; Lawal, M.; Matthias, S.Y.; Mshelbwala, P.P.; Niezgoda, M.; Ogunkoya, A.B.; Ogunniyi, A.O.; Okara, G.C.; Oligasa, B.O.; Ossai, O.P.; Oyemakinde, A.; Persom, M.K.; Rupprecht, C.E.; Saliman, O.A.; Sani, M.; Sanni-Adeniyi, O.A.; Satheshkumar, P.S.; Smith, T.G.; Soley, M.O.; Mallace, R.M.; Yennan, S.K.; Recuemco, S. Bat and *Lyssavirus* exposure among humans in area that celebrates bat festival, Nigeria, 2010 and 2013. *Emerging Infectious Diseases* 2020, 26, 1399-1408. doi:10.3201/eid2607.191016.
189. Weber, N.; Duengkae, P.; Fahr, J.; Dechmann, D.K.; Phengsakul, P.; Khumbucha, W.; Siriaronrat, B.; Wacharapluesadee, S.; Maneorn, P.; Wikelski, M.; Newman, S. High-resolution GPS tracking of Lyle's flying fox between temples and orchards in central Thailand. *The Journal of Wildlife Management* 2015, 79, 957-968. doi:10.1002/jwmg.904.
190. Whewell, G.D., Flying foxes in the Solomon Islands. In *Pacific Island Flying Foxes: Proceedings of an International Conservation Conference*. Hawaii, USA. 1-2 February 1990; pp. 102-104.

191. Weiss, S.; Nowak, K.; Fahr, J.; Wibbelt, G.; Mombouli, J.V.; Parra, H.-J.; Wolfe, N.D.; Schneider, B.S.; Leendertz, F.H. Henipavirus-related sequences in fruit bat bushmeat, Republic of Congo. *Emerging Infectious Diseases* 2012, 18, 1536-1537. doi:10.3201/eid1809.111607.
192. Wiles, G.J. Recent trends in the fruit bat trade on Guam. In *Pacific Island Flying Foxes: Proceedings of an International Conservation Conference*. Hawaii, USA. 1-2 February 1990; pp. 53-60.
193. Wiles, G.J.; Engbring, J.; Otobed, D. Abundance, biology, and human exploitation of bats in the Palau Islands. *Journal of Zoology* 1997, 241, 203-227. doi:10.1111/j.1469-7998.1997.tb01954.x.
194. Wiles, G.J.; Brooke, A.P.; Fleming, T.; Racey, P. Conservation threats to bats in the tropical Pacific Islands and insular Southeast Asia. In *Island bats: Evolution, Ecology, and Conservation*. Fleming, T.H., Racey, P.A., Eds.; University of Chicago Press, Chicago, IL, USA, 2009; 405-459. doi:10.7208/9780226253312.
195. Willcox, A.S.; Nambu, D.M. Wildlife hunting practices and bushmeat dynamics of the Banyangi and Mbo People of Southwestern Cameroon. *Biological Conservation* 2007, 134, 251-261. doi:10.1016/j.biocon.2006.08.016.
196. Wilson, D.E., Engbring, J. The flying foxes *Pteropus samoensis* and *Pteropus tonganus*: status in Fiji and Samoa. In *Pacific Island Flying Foxes: Proceedings of an International Conservation Conference*. Hawaii, USA. 1-2 February 1990; pp. 74-101.
197. Wodzicki, K.; Felten, H. The peka, or fruit bat (*Pteropus tonganus*) (Mammalia, Chiroptera), of Niue Island, South Pacific. *Pacific Science* 1975, 29, 131-138.
198. Wright, D.D.; Mack, A.L.; Paxton, E.H.; Menzies, J.I. Recent *Aproteles bulmerae* (Megachiroptera: Pteropodidae) bones found in Eastern Highlands Province, Papua New Guinea. *Mammalia* 1995, 59, 163-164.

**Table S1.** Languages ( $n = 27$ ), key terms ( $n = 720$ ), and social media sites ( $n = 20$ ) searched for evidence of bat exploitation for food and medicine. Search conducted June 2020–October 2021.

| Language  | Search Term       | Website(s)                   |
|-----------|-------------------|------------------------------|
| Afrikaans | #vlermuis         | Instagram                    |
|           | bloedsuiersop     | Facebook                     |
|           | bosvleis          | Facebook                     |
|           | jag vir vlermuise | Facebook                     |
|           | slagtang sop      | Facebook                     |
|           | vlermuis          | Facebook                     |
|           | vlermuissop       | Facebook                     |
|           | vleuel sop        | Facebook                     |
| Amharic   | የሌሊት ወፍ           | Facebook                     |
|           | የሌሊት ወፍ ሾርባ       | Facebook                     |
| Arabic    | #خفافيش           | Facebook, Instagram, Twitter |
|           | #الخفاش           | Facebook, Instagram, Twitter |
|           | #الخفاش الطائر    | Twitter                      |
|           | #الخفاش ☹️        | Twitter                      |
|           | #الخفافيش         | Facebook, Instagram, Twitter |
|           | #الخفافيش السود   | Instagram, Twitter           |
|           | #الخفافيش 🦇       | Instagram                    |
|           | #الخفافيش 🦇🦇      | Instagram                    |
|           | #الخفافيش 🦇       | Instagram, Twitter           |
|           | #السوق الرطب      | Twitter                      |
|           | #الغاب الخفافيش   | Twitter                      |
|           | #الكهوف           | Instagram, Twitter           |
|           | #الوطواط          | Instagram, Twitter           |
|           | #بيع الخفافيش     | Twitter                      |
|           | #تجارة الخفافيش   | Twitter                      |
|           | #حساء الخفافيش    | Instagram                    |

|                                    |                                  |
|------------------------------------|----------------------------------|
| خفاش#                              | Facebook, Instagram, Twitter     |
| خفاش الفاكهة المصري#               | Twitter                          |
| خفاش سياه#                         | Instagram, Twitter               |
| خفاش شب#                           | Instagram, Twitter               |
| خفاش كورونا#                       | Instagram, Twitter               |
| خفاش ميوه خوار#                    | Instagram                        |
| خفاش نخورده و باستن بنفشه ای#      | Instagram                        |
| خفاش[]#                            | Instagram, Twitter               |
| خفاشی#                             | Facebook, Instagram, Twitter     |
| خفاشی رفتار کنیم#                  | Instagram                        |
| خفاشی صندوق#                       | Instagram                        |
| خفافیش#                            | Facebook, Instagram              |
| خفافیش الظلام#                     | Facebook, Instagram, Twitter     |
| خفافیش الفاكهة#                    | Facebook, Instagram, Twitter     |
| خفافیش كورونا#                     | Facebook                         |
| دار الترجمة#                       | Twitter                          |
| سمالوط#                            | Twitter                          |
| سوق الخفافیش#                      | Facebook, Twitter                |
| سوق كورونا#                        | Twitter                          |
| صيد الخفافیش#                      | Twitter                          |
| عش الخفاش#                         | Instagram, Twitter               |
| عش الخفافیش#                       | Instagram                        |
| قتل الخفافیش#                      | Facebook                         |
| كورونا#                            | Twitter                          |
| كورونا الامارات#                   | Instagram                        |
| كورونا فايروس#                     | Instagram                        |
| كرونایی#                           | Instagram, Twitter               |
| لحم الغابة#                        | Twitter                          |
| لحم خفاش#                          | Twitter                          |
| لحوم الأدغا[]#                     | Twitter                          |
| نبیه#                              | Instagram, Twitter               |
| alkhafash alkhafash                | Facebook                         |
| alsiyahat alghidhayyat fi 'afriqia | Facebook                         |
| hasa' alkhafafish fi muritania     | Facebook                         |
| hasa' muritania                    | Facebook                         |
| khafafish muritania                | Facebook                         |
| mauritania hasa' alkhafafish       | Facebook                         |
| الخفافیش+الطب                      | Instagram, Twitter, and Facebook |
| بشفي+الخفافیش                      | Instagram, Twitter, and Facebook |
| إیادة الخفافیش                     | Facebook                         |
| أجنحة الخفافیش                     | Facebook, Twitter                |
| إزالة الخفافیش                     | Facebook, Twitter                |
| استئصال[] الخفافیش                 | Twitter                          |
| اصطياد الخفافیش                    | Twitter, YouTube                 |
| اصطياد الخفافیش في الشرق الاوسط    | YouTube                          |
| اضطهاد خفافیش                      | Facebook, Twitter                |
| إعداد الخفافیش                     | Facebook, Twitter                |
| أكل الخفافیش                       | Facebook, Twitter, YouTube       |
| الإسك[] الخفافیش                   | Facebook, Twitter                |
| الأسواق الرطبة                     | Twitter                          |
| التعذيب الخفافیش                   | Facebook                         |
| الخفاش                             | Instagram, Twitter               |
| الخفاش في افريقيا                  | Twitter, YouTube                 |
| الخفاش في الدول[] العربيه          | YouTube                          |
| الخفاش مصاص الدماء                 | Facebook, Twitter                |

|                                  |                              |
|----------------------------------|------------------------------|
| الخفافيش                         | Instagram, Twitter, YouTube  |
| الخفافيش الضخمة                  | Facebook, Twitter            |
| الخفافيش الظل                    | Twitter, YouTube             |
| الخفافيش العملاقة                | Facebook                     |
| الخفافيش القتنا                  | Twitter                      |
| الخفافيش الكهف                   | Twitter                      |
| الخفافيش في آسيا                 | Facebook                     |
| الخفافيش في السوق                | Facebook                     |
| الخفافيش في الفلبين              | Facebook                     |
| الرجل الخفاش                     | Facebook                     |
| الصيد الخفافيش                   | Facebook                     |
| القبض على الخفافيش               | Facebook, Twitter            |
| القضاء على الخفافيش#             | Facebook, Twitter            |
| الموت الخفافيش                   | Facebook                     |
| إنتاج الخفافيش                   | Facebook, Twitter            |
| إيذاء الخفافيش                   | Twitter                      |
| اين يصطاد الخفاش في الشرق الاوسط | YouTube                      |
| بيع الخفافيش                     | Twitter                      |
| تاجر الخفافيش#                   | Twitter                      |
| تتعرض خفافيش                     | Facebook, Twitter            |
| تصطاد الخفافيش                   | Facebook                     |
| تعذيب خفافيش                     | Twitter                      |
| ثمرة خفاش                        | Facebook, Twitter            |
| حرب الخفافيش                     | Facebook                     |
| حساء الخفافيش                    | Twitter                      |
| حساء الخفافيش#                   | Twitter                      |
| خفاش                             | Instagram, Twitter           |
| خفاش AND صيد                     | Twitter                      |
| خفاش الكورونا                    | Facebook                     |
| خفاش للبيع                       | Facebook, Twitter            |
| خفاشي                            | Instagram                    |
| خفافيش في طعام                   | Facebook                     |
| خفافيش                           | Facebook, Instagram, Twitter |
| خفافيش التي تضطهد                | Facebook                     |
| خفافيش السيئة                    | Facebook                     |
| خفافيش الصيد                     | Twitter                      |
| خفافيش الصين                     | Facebook, Twitter            |
| خفافيش الفاكهة                   | Twitter                      |
| خفافيش إندونيسيا                 | Facebook                     |
| خفافيش في السوق                  | Twitter                      |
| خفافيش في الصين                  | Facebook                     |
| خفافيش في باريس                  | Facebook, Twitter            |
| خفافيش قاتلة                     | Twitter                      |
| خفافيش كبيرة                     | Facebook                     |
| خفافيش للبيع                     | Facebook, Twitter            |
| خفافيش للبيع في السوق            | Facebook                     |
| سم الخفافيش                      | Facebook, Twitter            |
| سوق الخفافيش                     | Twitter, YouTube             |
| سوق رطبة                         | Twitter                      |
| سوق كورونا                       | Facebook                     |
| سيد الخفافيش                     | Facebook, Twitter            |
| صانداو الخفافيش                  | Twitter                      |
| صيد خفافيش#                      | Facebook, Twitter            |
| طبخ الخفاش                       | Facebook                     |

|         |                    |                                                            |
|---------|--------------------|------------------------------------------------------------|
|         | علامات الخفاش      | Facebook                                                   |
|         | غار عليصدر دوم #   | Instagram                                                  |
|         | فيروسات الخفافيش   | Facebook, Twitter                                          |
|         | قتل الخفافيش       | Instagram, Twitter                                         |
|         | قتل خفافيش         | Twitter                                                    |
|         | كورونا             | Instagram, Twitter                                         |
|         | #كورونا            | Facebook, Instagram                                        |
|         | لحم الخفافيش       | Twitter, YouTube                                           |
|         | لحم الخفافيش#      | Facebook, Twitter                                          |
|         | لحوم الطرائد       | Twitter                                                    |
|         | مبيد الخفافيش      | Facebook                                                   |
|         | مستعمرة الخفافيش   | Facebook, Twitter                                          |
|         | مضايقة الخفافيش#   | Twitter                                                    |
|         | مطاردة الخفافيش#   | Twitter                                                    |
|         | مواقع صيد الخفافيش | Facebook                                                   |
|         | موت الخفافيش       | Facebook                                                   |
|         | موت خفافيش         | Twitter                                                    |
|         | موسم الخفافيش      | Facebook, Twitter                                          |
|         | موقع بيع الخفافيش  | Facebook                                                   |
|         | وجبة الخفافيش      | Facebook, Instagram, Twitter                               |
|         | يوم الخفافيش       | Twitter                                                    |
|         | يؤكل الخفاش        | Facebook, Twitter                                          |
| Bengali | খাওয়া বাদুড়      | YouTube                                                    |
|         | ভিজা দোকান         | Facebook                                                   |
|         | "চামচিকা"          | Facebook                                                   |
|         | badur              | Facebook, Flickr, Google News, Instagram                   |
|         | badur + shikar     | Google News                                                |
|         | Badur + Syupa      | Instagram                                                  |
|         | Badur + স্যুপ      | Facebook, Twitter                                          |
|         | badur bazaar       | YouTube                                                    |
|         | badur chamchika    | Facebook, Flickr, Google News, Instagram, Twitter          |
|         | badur dhora        | Facebook, Flickr, Instagram, Twitter, YouTube              |
|         | Badur Khaoya       | Facebook, Flickr, Twitter, YouTube                         |
|         | badur shikar       | Facebook, YouTube                                          |
|         | badur+bazaar       | Google News                                                |
|         | Bazaar + badur     | Facebook, Twitter                                          |
|         | Bazaar + Chamchika | Facebook, Google News, Twitter                             |
|         | Chamchika          | Facebook, Flickr, Google News, Instagram, Twitter, YouTube |
|         | Chamchika + Syupa  | Instagram                                                  |
|         | Chamchika + স্যুপ  | Facebook, Twitter                                          |
|         | chamchika dhora    | Facebook, Flickr, Instagram, Twitter, YouTube              |
|         | kelelawar + sup    | Facebook                                                   |
|         | kola badur         | Facebook, Flickr, Google News, Instagram                   |
|         | kolabadur          | Facebook, Flickr, YouTube                                  |
|         | কলা বাদুড়         | Flickr, Google News, Instagram                             |
|         | কলাবাদুড়          | Flickr, Google News, Instagram, Twitter                    |
|         | চামচিকা            | Flickr, Google News, Twitter, YouTube                      |
|         | চামচিকা ধরা        | Facebook, Flickr, Instagram, Twitter                       |
|         | বাদুড়             | Facebook, Flickr, Twitter                                  |
|         | বাদুড় চামচিকা     | Facebook, Google News                                      |
|         | বাদুড় ধরা         | Facebook, Flickr, Instagram, Twitter                       |
|         | বাদুড়ের+ওষুধ      | Facebook, Instagram, Twitter                               |
|         | ব্যাটি+নিরাময়     | Facebook, Instagram, Twitter                               |

|         |                       |                                    |
|---------|-----------------------|------------------------------------|
| Bisaya  | kabog                 | Facebook                           |
|         | kwaknit               | Facebook, Instagram                |
| Chinese | 蝙蝠                    | Instagram, TikTok, Twitter, Weibo  |
|         | 蝙蝠+治愈                 | Facebook, Instagram, Twitter       |
|         | 蝙蝠+药                  | Facebook, Instagram, Twitter       |
|         | 蝙蝠汤                   | Twitter                            |
| English | #accra                | Instagram                          |
|         | #accraghana           | Instagram                          |
|         | #accraghanagh         | Instagram                          |
|         | #aframplains          | Instagram                          |
|         | #africanfoodie        | Instagram                          |
|         | #africanfoodvendor    | Instagram                          |
|         | #africanmeat          | Instagram                          |
|         | #bat eating           | Twitter                            |
|         | #bat meat seychelles  | Facebook                           |
|         | #batdeath             | Instagram                          |
|         | #bathunting           | Instagram                          |
|         | #batinmyhouse         | Instagram                          |
|         | #batslayer            | Instagram                          |
|         | #batsofafrica         | Instagram                          |
|         | #batsoup              | Facebook, Twitter                  |
|         | #bushmeat             | Instagram                          |
|         | #chopbar              | Instagram                          |
|         | #deadbat              | Instagram                          |
|         | #ghana                | Facebook                           |
|         | #gluetrap             | Instagram                          |
|         | #guano                | Instagram                          |
|         | #guyana               | Instagram                          |
|         | #illegalpettrade      | Instagram                          |
|         | #iwokrama             | Instagram                          |
|         | #karoo                | Instagram                          |
|         | #malawi               | Instagram                          |
|         | #mexicobat            | Tumblr                             |
|         | #mexicobathunting     | LinkedIn                           |
|         | #mistnet              | Instagram                          |
|         | #naijafoodvendor      | Facebook, Instagram                |
|         | #nigerianfoodshopper  | Instagram                          |
|         | #palau                | Facebook, YouTube                  |
|         | #politicalanimallobby | Instagram                          |
|         | #spainbat             | Tumblr                             |
|         | #voltaafrica          | Instagram                          |
|         | #witchesmarket        | TikTok                             |
|         | abidjan bat           | Facebook                           |
|         | abidjan bushmeat      | Facebook                           |
|         | accra bat             | Facebook                           |
|         | accra bushmeat        | Facebook                           |
|         | aframplains           | Instagram                          |
|         | bat                   | Twitter                            |
|         | bat+cures             | Facebook, Instagram, Twitter       |
|         | bat delicacy          | Facebook                           |
|         | bat eating            | YouTube                            |
|         | bat hunt              | Facebook                           |
|         | bat hunter            | Facebook                           |
|         | bat hunting           | Facebook, Reddit, Twitter, YouTube |
|         | bat hunting mexico    | Reddit                             |

|                        |                              |
|------------------------|------------------------------|
| bat meat               | Reddit, Twitter, YouTube     |
| bat+medicine           | Facebook, Instagram, Twitter |
| bat murder             | Reddit, Twitter              |
| bat persecution        | Reddit, Twitter              |
| bat soup               | Reddit, Twitter              |
| bat soup delicacy      | Facebook                     |
| bat soup spain         | Reddit, YouTube              |
| bat wings              | Reddit, Twitter              |
| bats bolivia           | Reddit                       |
| bats peru              | Reddit                       |
| benin bat              | Facebook                     |
| benin bushmeat         | Facebook                     |
| burkina faso bat       | Facebook                     |
| burkina faso bushmeat  | Facebook                     |
| burkina faso food      | Facebook                     |
| bushmeat               | Facebook                     |
| cameroon bat           | Facebook                     |
| cameroon bushmeat      | Facebook                     |
| cape verde bat         | Facebook                     |
| cape verde bushmeat    | Facebook                     |
| conakry bat            | Facebook                     |
| conakry bushmeat       | Facebook                     |
| dakar bat              | Facebook                     |
| dakar bushmeat         | Facebook                     |
| dead bat               | Reddit                       |
| dead bats              | Twitter                      |
| delicacy bat           | Facebook                     |
| doula bat              | Facebook                     |
| doula bushmeat         | Facebook                     |
| eating bat spain       | YouTube                      |
| filipinobatman         | Instagram                    |
| freetown bushmeat      | Facebook                     |
| freetwown bat          | Facebook                     |
| fruit bat              | Reddit, Twitter              |
| fruitbatsoup           | Instagram                    |
| gambia bat             | Facebook                     |
| gambia bushmeat        | Facebook                     |
| gastotourist bat soup  | Facebook                     |
| ghana bat              | Facebook                     |
| ghana bushmeat         | Facebook                     |
| gluetrap               | Facebook                     |
| guinea bat             | Facebook                     |
| guinea bissau bat      | Facebook                     |
| guinea bissau bushmeat | Facebook                     |
| guinea bushmeat        | Facebook                     |
| ibadan bat             | Facebook                     |
| ibadan bushmeat        | Facebook                     |
| indonesian bat hunting | Facebook                     |
| ivory coast bat        | Facebook                     |
| ivory coast bushmeat   | Facebook                     |
| kaduna bat             | Facebook                     |
| kaduna bushmeat        | Facebook                     |
| kano bat               | Facebook                     |
| kano bushmeat          | Facebook                     |
| kissama                | Instagram                    |
| lagos bat              | Facebook                     |

|        |                                       |                              |
|--------|---------------------------------------|------------------------------|
| French | lagos bushmeat                        | Facebook                     |
|        | liberia bat                           | Facebook                     |
|        | liberia bushmeat                      | Facebook                     |
|        | maiduguri bat                         | Facebook                     |
|        | maiduguri bushmeat                    | Facebook                     |
|        | Malanje                               | Instagram                    |
|        | mali bat                              | Facebook                     |
|        | mali bushmeat                         | Facebook                     |
|        | mauritania bat                        | Facebook                     |
|        | mauritania bushmeat                   | Facebook                     |
|        | Mayumbe                               | Instagram                    |
|        | morning market                        | Reddit, Twitter              |
|        | niger bat                             | Facebook                     |
|        | niger bushmeat                        | Facebook                     |
|        | nigeria bat                           | Facebook                     |
|        | nigeria bushmeat                      | Facebook                     |
|        | port harcourt bat                     | Facebook                     |
|        | port harcourt bushmeat                | Facebook                     |
|        | saint helena bat                      | Facebook                     |
|        | senegal bat                           | Facebook                     |
|        | senegal bushmeat                      | Facebook                     |
|        | sierra leone bat                      | Facebook                     |
|        | sierra leone bushmeat                 | Facebook                     |
|        | togo bat                              | Facebook                     |
|        | togo bushmeat                         | Facebook                     |
|        | yaounde bat                           | Facebook                     |
|        | yaounde bushmeat                      | Facebook                     |
|        | #chauvesouris                         | Instagram                    |
|        | #chauves-souris                       | Instagram                    |
|        | #chauves-souris de chasse             | Facebook, la Libre Afrique   |
|        | #manger des chauves-souris            | Twitter, Infos Israel        |
|        | #seychelles                           | Instagram                    |
|        | #seychellesbat                        | Instagram                    |
|        | #seychellesbats                       | Instagram                    |
|        | #viande de brousse                    | Twitter, News website        |
|        | #viande de chauve-souris              | Facebook, Twitter            |
|        | #viandedebrousse                      | Facebook, Instagram          |
|        | asthme de chauve-souris               | Facebook                     |
|        | benin chauve souris                   | Facebook                     |
|        | bijoux de dents de chauve souris      | Facebook                     |
|        | bouillir le bouillon de chauve souris | Facebook                     |
|        | burkina faso chauve souris            | Facebook                     |
|        | burkina faso chauvesouris             | Facebook                     |
|        | burkina faso soupe                    | Facebook                     |
|        | burundi chauve souris                 | Facebook                     |
|        | cameroon chauve souris                | Facebook                     |
|        | cécité chauve-souris cure             | Facebook                     |
|        | chasse                                | Instagram                    |
|        | chasse à la chauve-souris             | Twitter                      |
|        | chasse aux chauves-souris             | Twitter                      |
|        | Chauve souris + fume                  | Facebook                     |
|        | Chauve souris + Gril                  | Facebook                     |
|        | Chauve-souris+guérison                | Facebook, Instagram, Twitter |
|        | Chauve-souris+médicament              | Facebook, Instagram, Twitter |
|        | Chauve souris + Ragout                | Facebook                     |
|        | chauve souris + soupe                 | Facebook                     |

|                                            |                       |
|--------------------------------------------|-----------------------|
| Chauve souris + tradition                  | Facebook              |
| chauve souris au marche ghana              | Facebook              |
| chauve souris brousse afrique              | Facebook              |
| chauve souris delicatessen                 | Facebook              |
| chauve souris en egypte                    | Facebook              |
| chauve souris ghana                        | Facebook              |
| chauve souris viande de brousse            | Facebook              |
| chauvesouris                               | Instagram             |
| chauve-souris volante athsma               | Facebook              |
| chauves-souris de chasse                   | Facebook, YouTube     |
| congo chauve souris                        | Facebook              |
| congo nguembo                              | Facebook              |
| consomme de chauve souris                  | Facebook              |
| cote d'ivoire chauve souris                | Facebook              |
| cure athsma africaine                      | Facebook              |
| cure de chauve-souris                      | Facebook              |
| cure de chauve-souris asthme               | Facebook              |
| cure de rhumatisme                         | Facebook              |
| cure de rhumatisme chauve-souris           | Facebook              |
| cure d'épilepsie chauve-souris             | Facebook              |
| dégustation de chauve-souris               | Twitter, YouTube      |
| dents de chauve souris                     | Facebook              |
| élixir de chauve-souris                    | Facebook              |
| gabon chauve souris                        | Facebook              |
| guinee equatoriale chauve souris           | Facebook              |
| jus de viande chauve souris                | Facebook              |
| la chasse de chauve-souris en afrique      | Facebook              |
| la soupe a la chauve de souris en afrique  | Facebook              |
| la soupe de la chauve de souris en afrique | Facebook              |
| le bouillon de chauve-souris en afrique    | Facebook              |
| le diner de chauve souris                  | Facebook              |
| le gout de nguembo                         | Facebook              |
| le plat de chauve souris                   | Facebook              |
| le potage de chauve souris                 | Facebook              |
| les chasseurs des chauve-souris            | Facebook, Google News |
| Les marchés de Segou                       | Facebook              |
| les vendeurs des chauve-souris             | Google News           |
| les vendeuses des chauve-souris            | Facebook              |
| mali chauvesouris                          | Facebook              |
| manger des chauves-souris                  | Facebook, Twitter     |
| marché aux chauves-souris                  | Facebook              |
| marche centrale de kisangani chauve-souris | Facebook              |
| marché de la médecine de chauve-souris     | Facebook              |
| marché de la viande de brousse             | Facebook              |
| marche de la viande de chauve souris fumee | Facebook              |
| marché de la viande de chauve-souris       | Facebook              |
| marche viande de chauve souris             | Facebook              |
| marmite chauve souris soupe                | Facebook              |
| medecine de chauve souris sue le marche    | Facebook              |
| médecine de chauve-souris                  | Facebook              |
| médecine de chauve-souris à vendre         | Facebook              |
| medecine du sand de chauve souris          | Facebook              |
| médecine traditionnelle de roussette       | Facebook              |
| medecine traditionnelle des chauve souris  | Facebook              |
| muritania cuisine                          | Facebook              |
| ngembo                                     | Facebook              |

|       |                                             |                                    |
|-------|---------------------------------------------|------------------------------------|
|       | ngembo de chauve souris                     | Facebook                           |
|       | nourriture de chauve souris                 | Facebook                           |
|       | pama chauvesouris                           | Facebook                           |
|       | peau de chauve souris                       | Facebook                           |
|       | place du concert market                     | Facebook                           |
|       | potion de chauve-souris                     | Facebook                           |
|       | repas de chauve souris afrique              | Facebook                           |
|       | repas de chauve souris en france            | Facebook                           |
|       | repas traditionnel de chauve souris         | Facebook                           |
|       | repas traditionnel de rousette              | Facebook                           |
|       | republique centrafricaine chauve souris     | Facebook                           |
|       | Rousette + Marche                           | Facebook                           |
|       | Rousette + Viande de Brousse                | Facebook                           |
|       | sechellyes chauve souris                    | Facebook                           |
|       | sechellyes chauve souris bat meat           | Facebook                           |
|       | senegal chauve souris                       | Facebook                           |
|       | seychelles chauve souris                    | Facebook                           |
|       | seychelles restaurants                      | Facebook                           |
|       | seychelles restos                           | Facebook                           |
|       | soupe aux ailes                             | Facebook                           |
|       | soupe bizarre                               | Facebook                           |
|       | soupe de chauve-souris                      | Facebook                           |
|       | Soupe de chauve-souris aux fruits           | Facebook                           |
|       | soupe de chauve-souris cécité               | Facebook                           |
|       | soupe de chauve-souris épilepsie            | Facebook                           |
|       | soupe de chauve-souris rhumatismale         | Facebook                           |
|       | soupe de crocs                              | Facebook                           |
|       | togo chauve souris                          | Facebook                           |
|       | togo chauvesouris                           | Facebook                           |
|       | togo soupe                                  | Facebook                           |
|       | traitement de la chauve-souris rhumatismale | Facebook                           |
|       | traitement de l'épilepsie chauve-souris     | Facebook                           |
|       | un repas de chauve-souris                   | Facebook, Google News              |
|       | un velote de chauve souris                  | Facebook                           |
|       | vendeur de chauve souris produits locaux    | Facebook                           |
|       | vendre des chauves-souris                   | Twitter                            |
|       | viande de brousse                           | Facebook, Twitter                  |
|       | viande de brousse de chauve-souris          | YouTube                            |
|       | viande de chauve souris                     | Facebook                           |
|       | viande de chauve-souris                     | Facebook, Twitter                  |
|       | viande de chauve-souris congo               | Facebook                           |
|       | viande de chauve-souris seychelles          | Facebook                           |
|       | viandedebrousse                             | Instagram                          |
|       | viandedebrousse 🐭🐭                          | Instagram                          |
| Hindi | chamagaadad                                 | Google News, Instagram             |
|       | chamgaadad                                  | Facebook, Flickr, Twitter          |
|       | chamgadaad pakana                           | Facebook, Flickr, Twitter          |
|       | chamgadad                                   | Facebook, Flickr, Twitter          |
|       | chamgadad pakana                            | Facebook, Flickr, Twitter          |
|       | chamgadar                                   | Facebook, Flickr, YouTube          |
|       | chamgadar bazaar                            | Facebook, Flickr, Twitter, YouTube |
|       | chamgadar bazar                             | Flickr, Twitter                    |
|       | chamgadar bechna                            | Facebook, Flickr, Twitter, YouTube |
|       | chamgadar catching                          | YouTube                            |
|       | chamgadar cooking                           | Facebook, Instagram, YouTube       |
|       | chamgadar eating                            | Facebook, Instagram, YouTube       |

|      |                           |                                                            |
|------|---------------------------|------------------------------------------------------------|
| Igbo | chamgadar geela bazaar    | Facebook, YouTube                                          |
|      | chamgadar hunting         | Facebook, YouTube                                          |
|      | chamgadar ka khana        | Flickr, Twitter, YouTube                                   |
|      | chamgadar khana           | Facebook, Flickr, Instagram, Twitter, YouTube              |
|      | chamgadar ko bechna       | YouTube                                                    |
|      | chamgadar ko pakana       | YouTube                                                    |
|      | chamgadar market          | Facebook                                                   |
|      | chamgadar maro            | Facebook, YouTube                                          |
|      | chamgadar pakana          | Facebook, Flickr, Twitter, YouTube                         |
|      | chamgadar pakarna         | Facebook, YouTube                                          |
|      | eating चमेरो              | YouTube                                                    |
|      | geela bazaar              | Facebook, YouTube                                          |
|      | pokhara ko chamero        | YouTube                                                    |
|      | चमगादड़                   | Facebook, Flickr, Google News, Instagram, Twitter, YouTube |
|      | चमगादड़ becho             | Instagram                                                  |
|      | चमगादड़ eating            | YouTube                                                    |
|      | चमगादड़ selling           | YouTube                                                    |
|      | चमगादड़ की कहानी          | YouTube                                                    |
|      | चमगादड़ के बारेमे जानकारी | YouTube                                                    |
|      | चमगादड़ खाओ               | YouTube                                                    |
|      | चमगादड़ खाना              | Facebook, Flickr, Instagram, YouTube                       |
|      | चमगादड़ खाना बनाना        | Facebook, Twitter, YouTube                                 |
|      | चमगादड़ खावो              | Facebook, Twitter, YouTube                                 |
|      | चमगादड़ गुफा              | Facebook, Instagram, Twitter, YouTube                      |
|      | चमगादड़ पकाना             | Facebook, Flickr, Twitter, YouTube                         |
|      | चमगादड़ बाजार             | Facebook, Twitter, YouTube                                 |
|      | चमगादड़ बेचते हैं         | YouTube                                                    |
|      | चमगादड़ बेचना             | Facebook, YouTube                                          |
|      | चमगादड़ बेचना हैं         | YouTube                                                    |
|      | चमगादड़ माँ               | Instagram, Twitter, YouTube                                |
|      | चमगादड़ मार्किट           | Facebook, YouTube                                          |
|      | चमगादड़ शिकार             | Facebook, Instagram, Twitter, YouTube                      |
|      | चमगादड़ की नेट            | YouTube                                                    |
|      | चमगादड़ की मौत            | YouTube                                                    |
|      | चमगादड़+का इलाज           | Facebook, Instagram, Twitter                               |
|      | चमगादड़+की दवा            | Facebook, Instagram, Twitter                               |
|      | चमगादड़खाने का फायदा"     | YouTube                                                    |
|      | चमगादर मारो               | Facebook, YouTube                                          |
|      | चमेरो खाना बनाना          | Twitter                                                    |
|      | चमेरो बाजार               | Twitter                                                    |
|      | फ्लार्ड फॉक्सेज           | Facebook,GoogleNews,Instagram,Twitter,YouTube              |
|      | शिकार करना चमगादड़        | Google News, Instagram, Twitter, YouTube                   |
|      | njem nleghari anya        | Facebook                                                   |
|      | nri Afrika                | Facebook                                                   |
|      | nri di egwu               | Facebook                                                   |
|      | ofe adighi mma            | Facebook                                                   |
|      | ofe anumanu               | Facebook                                                   |
|      | ofe nku                   | Facebook                                                   |
|      | usu nku                   | Facebook                                                   |
|      | usu nri                   | Facebook                                                   |
|      | usu ofe                   | Facebook                                                   |
|      | usu stew                  | Facebook                                                   |

|                   |                         |                                             |
|-------------------|-------------------------|---------------------------------------------|
| <i>Ilocano</i>    | kurarapnit              | Facebook                                    |
| <i>Ilonggo</i>    | kabug                   | Facebook                                    |
| <i>Indonesian</i> | #kelelawar              | Facebook, Instagram                         |
|                   | berburukelelawar        | Instagram                                   |
|                   | kelelawar               | Instagram                                   |
|                   | kelelawar + berburu     | Facebook                                    |
|                   | kelelawar + berburu     | Google News, Twitter                        |
|                   | kelelawar + beruru      | Google News, Twitter                        |
|                   | kelelawar+obat          | Facebook, Instagram, Twitter                |
|                   | kelelawar + sup         | Facebook, Facebook Marketplace, Google News |
|                   | kelelawar+berburu       | Twitter                                     |
|                   | kelelawar+sup           | Twitter                                     |
|                   | menjual+kelelawar       | Twitter                                     |
|                   | menyembuhkan kelelawar  | Facebook, Instagram, Twitter                |
|                   | pasar + bacem           | Facebook, Google News, Twitter              |
|                   | pasar + codot           | Google News, Twitter                        |
|                   | pasar + codot + bacem   | Google News                                 |
|                   | pasar + kelelawar       | Facebook, Twitter                           |
|                   | pasar bacem             | Google Scholar                              |
|                   | paser + codot           | Facebook                                    |
|                   | paser + kelelawar       | Google News                                 |
| <i>Japanese</i>   | コウモリ+クレス                | Facebook, Instagram, Twitter                |
|                   | コウモリ+薬                  | Facebook, Instagram, Twitter                |
| <i>Korean</i>     | #박쥐날개 (bat wings)       | Instagram                                   |
|                   | #아침시장 (morning market)  | Instagram                                   |
|                   | #한국고기 (korean meat)     | Instagram                                   |
|                   | 치료+박쥐                   | Facebook, Instagram, Twitter                |
|                   | 과일 박쥐                   | Facebook, Twitter                           |
|                   | 과일 박쥐 (fruit bat)*      | Facebook, Twitter                           |
|                   | 과일박쥐 (fruit bats)       | Instagram                                   |
|                   | 박쥐 (bat)                | Facebook, Instagram, Twitter                |
|                   | 박쥐 고기                   | Daum, Nate                                  |
|                   | 박쥐 고기 (bat meat)        | Facebook, Twitter                           |
|                   | 박쥐 구경                   | Naver                                       |
|                   | 박쥐 날개 (bat wings)       | Facebook, Twitter                           |
|                   | 박쥐 박해 (bat persecution) | Facebook, Twitter                           |
|                   | 박쥐 사냥                   | Google                                      |
|                   | 박쥐 사냥 (bat hunting)     | Facebook, Twitter                           |
|                   | 박쥐 사냥꾼                  | Nate, Naver                                 |
|                   | 박쥐 식사 (bat meal)        | Facebook, Twitter                           |
|                   | 박쥐 죽음                   | Naver                                       |
|                   | 박쥐 침입                   | Naver                                       |
|                   | 박쥐+약                    | Facebook, Instagram, Twitter                |
|                   | 박쥐고기                    | Google, Naver, YouTube                      |
|                   | 박쥐고기 (bats)             | Facebook, Instagram, Twitter                |
|                   | 박쥐고문                    | Naver                                       |

|           |                             |                                       |
|-----------|-----------------------------|---------------------------------------|
|           | 박쥐떼                         | Naver                                 |
|           | 박쥐박해                        | YouTube                               |
|           | 박쥐사냥                        | Nate, Naver, YouTube                  |
|           | 박쥐사냥꾼                       | YouTube                               |
|           | 박쥐스타그램                      | Instagram                             |
|           | 박쥐스프                        | Instagram                             |
|           | 박쥐시장                        | Naver, YouTube                        |
|           | 박쥐시장 (bat market)           | Facebook, Twitter                     |
|           | 박쥐식사 (bat food)             | Instagram                             |
|           | 배트 살인 (bat murder)          | Facebook, Twitter                     |
|           | 배트 수프                       | Facebook, Twitter                     |
|           | 배트 수프(bat soup)*            | Facebook, Twitter                     |
|           | 아침 시장 (morning market)      | Facebook, Twitter                     |
|           | 아침시장 (morning market)       | Twitter                               |
|           | 죽은 박쥐 (dead bat)            | Facebook, Instagram, Twitter          |
|           | 죽은박쥐                        | Naver                                 |
| Malaysian | kelawar                     | Facebook                              |
|           | kelawarbuah                 | Instagram                             |
|           | kelawar+penawar             | Facebook, Instagram, Twitter          |
|           | kelawar +ubat               | Facebook, Instagram, Twitter          |
| Nepali    | chamero                     | YouTube                               |
|           | chamero bechne              | YouTube                               |
|           | chamero gufa                | Facebook, YouTube                     |
|           | chamero hunting             | YouTube                               |
|           | chamero market              | YouTube                               |
|           | chamero pakaune             | YouTube                               |
|           | chamgadar ka khana          | YouTube                               |
|           | pokhara ko chamero          | Facebook                              |
|           | selling of चमेरो            | YouTube                               |
|           | चमगादर खरीदना               | YouTube                               |
|           | चमेरो (chamero)             | Twitter, YouTube                      |
|           | चमेरो bazaar                | YouTube                               |
|           | चमेरो khane                 | Facebook, Twitter                     |
|           | चमेरो eating                | YouTube                               |
|           | चमेरो pakaune               | Twitter, YouTube                      |
|           | चमेरो खाना बनाना            | Facebook, YouTube                     |
|           | चमेरो गुफा                  | Facebook, Instagram, Twitter, YouTube |
|           | चमेरो पालन                  | YouTube                               |
|           | चमेरो बाजार                 | Facebook, YouTube                     |
|           | चमेरो बिखन                  | YouTube                               |
|           | ब्याट                       | YouTube                               |
|           | ब्याट+औषधि                  | Facebook, Instagram, Twitter          |
|           | ब्याट निको हुन्छ            | Facebook, Instagram, Twitter          |
| Persian   | Nagpapagaling ng mga paniki | Facebook, Instagram, Twitter          |
|           | Pagpapagaling ng paniki     | Facebook, Instagram, Twitter          |
|           | #خفاش خوار                  | Instagram, Twitter                    |
|           | #خفاش کرونایی               | Instagram                             |
|           | #خفاشها                     | Instagram, Twitter                    |

|            |                                   |                              |
|------------|-----------------------------------|------------------------------|
|            | خفاشهای آخوندی کرونا بی#          | Instagram                    |
|            | دارالترجمه#                       | Instagram                    |
|            | دارالترجمه جهانگیری#              | Instagram                    |
|            | غار علیصدر بزرگترین غار آبی جهان# | Instagram                    |
|            | گوشت خفاش#                        | Instagram, Twitter           |
|            | لانه ی خفاش ها#                   | Twitter                      |
|            | معاً نعر □ کورونا#                | Twitter                      |
|            | ویروس خفاش#                       | Instagram, Twitter           |
|            | داروی+خفاش                        | Facebook, Instagram, Twitter |
|            | خفاش اللیل                        | Instagram                    |
|            | خفاش دیوانه                       | Instagram                    |
|            | خفاش روز                          | Instagram                    |
|            | خفاش هالوین                       | Instagram                    |
|            | خفاش های معمولی                   | Instagram                    |
|            | خفاش خور کثیف#                    | Instagram                    |
|            | خفاشی دوحالی                      | Instagram                    |
|            | خفاشیا □                          | Instagram                    |
|            | خوفاش#                            | Instagram, Twitter           |
|            | درم □+خفاش                        | Facebook, Instagram, Twitter |
|            | رمض □ جایو #                      | Twitter                      |
|            | عزت جایو #                        | Twitter                      |
|            | مترسک#                            | Instagram, Twitter           |
| Portuguese | armadilha de morcego              | Facebook, Twitter            |
|            | bruxaria de morcego               | Facebook, Twitter            |
|            | caca ao morcego                   | Facebook                     |
|            | caca de morcego                   | Twitter                      |
|            | churrasco de morcego              | Facebook, Twitter            |
|            | comendo morcegos                  | Facebook, Twitter            |
|            | Comida de morcego                 | Facebook                     |
|            | desmodus rotundus                 | Instagram, Twitter           |
|            | maldição de morcego               | Facebook, Twitter            |
|            | Matador de morcego                | Facebook                     |
|            | matança de morcegos               | Facebook, Twitter            |
|            | medicina de morcego               | Facebook, Twitter            |
|            | morcego                           | Twitter                      |
|            | morcego assado                    | Facebook                     |
|            | morcego assassino                 | Twitter                      |
|            | morcego assustador                | Facebook, Twitter            |
|            | morcego+curas                     | Facebook, Instagram, Twitter |
|            | morcego da fruta                  | Twitter                      |
|            | morcego frito                     | Facebook, Twitter            |
|            | morcego hematofago                | Twitter                      |
|            | morcego+médico                    | Facebook, Instagram, Twitter |
|            | mordida de morcego                | Facebook                     |
|            | parque Nacional de Kissama        | Instagram                    |
|            | Prato de morcego                  | Facebook, Twitter            |
|            | prato do morcego                  | Facebook                     |
|            | Proteção de morcego               | Facebook                     |
|            | rede de morcego                   | Facebook, Twitter            |
|            | remover morcego                   | Twitter                      |
|            | Repelente de morcego              | Facebook                     |
|            | sopa de morcego                   | Twitter                      |
|            | Sugadores de sangue               | Facebook                     |
|            | veneno de morcego                 | Facebook, Twitter            |
|            | veneno do morcego                 | Facebook                     |

|                           |                               |                              |
|---------------------------|-------------------------------|------------------------------|
| <i>Seychellois Creole</i> | #batsousouri                  | Facebook                     |
|                           | #cazademurcielago             | Instagram                    |
|                           | #cazadevampiros               | Instagram                    |
|                           | #comidabat                    | LinkedIn                     |
|                           | #mexico                       | Tumblr                       |
|                           | #murcielago                   | Instagram, LinkedIn, Tumblr  |
|                           | #murcielagocoronavirus        | TikTok                       |
|                           | #murcielagos                  | Instagram, TikTok, Tumblr    |
|                           | #murcielagosdelafruta         | Instagram                    |
|                           | #murcielagosdemexico          | Instagram                    |
|                           | #pinchemurcielago             | Instagram                    |
|                           | #pobremurcielago              | Instagram                    |
|                           | #sopademurcielago             | TikTok                       |
|                           | caceria de murcielagos        | Facebook, Reddit, Twitter    |
|                           | caceria murcielago            | TikTok                       |
|                           | calle de brujas               | TikTok                       |
|                           | captura de murcielagos        | Facebook, Reddit, Twitter    |
|                           | caza de murcielagos           | YouTube                      |
|                           | Caza de murcielagos13-07-2020 | Twitter                      |
|                           | eliminacion de murcielagos    | Facebook, Reddit             |
|                           | eliminacion murcielagos       | TikTok                       |
|                           | eliminar murcielagos          | Reddit, Twitter              |
|                           | maten a los murcielagos       | Twitter                      |
|                           | murcielagos                   | Reddit                       |
|                           | murcielago bolivia            | TikTok                       |
|                           | murciélagos+cura              | Facebook, Instagram, Twitter |
|                           | murciélago + medicina         | Facebook, Instagram, Twitter |
|                           | murcielago mexico             | TikTok                       |
|                           | murcielago peru               | TikTok                       |
|                           | murcielago eating             | YouTube                      |
|                           | sangre de murcielago          | TikTok, YouTube              |
|                           | sopa de murcielagos           | Reddit                       |
| <i>Sundanese</i>          | kalong+landong                | Facebook, Instagram, Twitter |
|                           | kalong+nyageurkeun            | Facebook, Instagram, Twitter |
| <i>Swahili</i>            | kula popo                     | Facebook                     |
|                           | nyama ya popo                 | Facebook                     |
|                           | popo+dawa                     |                              |
|                           | popo+tiba                     |                              |
| <i>Tagalog</i>            | #exoticfood #paniki           | Facebook                     |
|                           | adobong paniki                | Facebook                     |
|                           | aswang                        | Instagram                    |
|                           | gata paniki                   | Facebook                     |
|                           | ginataang paniki              | Facebook                     |
|                           | lgcabuyao                     | Instagram                    |
|                           | inihaw paniki                 | Facebook                     |
|                           | kabog pulutan                 | Facebook                     |
|                           | paksiw paniki                 | Facebook                     |
|                           | paniki                        | Facebook, Instagram          |
|                           | paniki+gamot                  | Facebook, Instagram, Twitter |
|                           | paniki+nakakagamot            | Facebook, Instagram, Twitter |
|                           | paniki pulutan                | Facebook, Instagram          |
|                           | poi bat                       | Instagram                    |
|                           | sinigang paniki               | Facebook                     |
| <i>Thai</i>               | ค้างคาวผลไม้                  | Instagram                    |
| <i>Urdu</i>               | دوا کا چمگادڑ                 | Facebook, Instagram, Twitter |
|                           | بلے کا علاج                   | Facebook, Instagram, Twitter |

---

*Zulu*

#ilulwane

Facebook, Instagram

---

**Table S2.** Bat use by country (n=83), measured as unique accounts of locations reported in the literature (1974–2021) and on social media (September 2007–October 2021).

| Country/Territory                | Food | Medicine | Ailments Treated                                                                                                                                           | Human Organ Systems                | Bat Part                             | Route of Administration |
|----------------------------------|------|----------|------------------------------------------------------------------------------------------------------------------------------------------------------------|------------------------------------|--------------------------------------|-------------------------|
| American Samoa                   | 12   | 0        | unknown                                                                                                                                                    | unknown                            | unknown                              | unknown                 |
| Afghanistan                      | 0    | 1        | unknown                                                                                                                                                    | unknown                            | unknown                              | unknown                 |
| Andaman and Nicobar Islands      | 1    | 3        | unknown                                                                                                                                                    | unknown                            | meat                                 | ingested                |
| Angola                           | 1    | 0        | unknown                                                                                                                                                    | unknown                            | unknown                              | unknown                 |
| Australia                        | 5    | 1        | asthma                                                                                                                                                     | respiratory                        | whole                                | ingested                |
| Bahrain                          | 0    | 1        | unknown                                                                                                                                                    | unknown                            | unknown                              | unknown                 |
| Bangladesh                       | 9    | 10       | asthma, fever, rheumatism, unknown                                                                                                                         | immune, respiratory, skeletal      | bones, hair, unknown                 | ingested, topical       |
| Benin                            | 2    | 0        | unknown                                                                                                                                                    | unknown                            | unknown                              | unknown                 |
| Bhutan                           | 0    | 1        | unknown                                                                                                                                                    | unknown                            | unknown                              | unknown                 |
| Bolivia                          | 9    | 10       | backache, epilepsy, headache, kidney conditions, mental health                                                                                             | nervous, skeletal, urinary         | fluids, unknown                      | unknown                 |
| Bosnia and Herzegovina           | 1    | 0        | unknown                                                                                                                                                    | unknown                            | unknown                              | unknown                 |
| Brazil                           | 3    | 4        | alcoholism, asthma, contraceptive, unknown                                                                                                                 | nervous, reproductive, respiratory | ash, unknown                         | unknown                 |
| Burkina Faso                     | 1    | 0        | unknown                                                                                                                                                    | unknown                            | unknown                              | unknown                 |
| Cambodia                         | 7    | 1        | cough, unknown                                                                                                                                             | respiratory                        | fluids, unknown                      | unknown                 |
| Cameroon                         | 13   | 0        | fertility                                                                                                                                                  | reproductive                       | whole                                | unknown                 |
| China                            | 90   | 20       | cancer, cough, eyesight, viruses, unknown                                                                                                                  | immune, respiratory, sensory       | feces, fluids, wings, unknown        | ingested                |
| CNMI                             | 15   | 0        | unknown                                                                                                                                                    | unknown                            | unknown                              | unknown                 |
| Comoros                          | 4    | 0        | unknown                                                                                                                                                    | unknown                            | unknown                              | unknown                 |
| Cook Islands                     | 5    | 0        | unknown                                                                                                                                                    | unknown                            | unknown                              | unknown                 |
| Cote d'Ivoire                    | 12   | 0        | unknown                                                                                                                                                    | unknown                            | unknown                              | unknown                 |
| Democratic Republic of the Congo | 31   | 1        | asthma, kidney conditions, systematic disorders                                                                                                            | respiratory, urinary               | meat                                 | ingested                |
| Egypt                            | 1    | 2        | unknown                                                                                                                                                    | unknown                            | unknown                              | unknown                 |
| Equatorial Guinea                | 3    | 0        | unknown                                                                                                                                                    | unknown                            | unknown                              | unknown                 |
| Federates States of Micronesia   | 8    | 0        | unknown                                                                                                                                                    | unknown                            | unknown                              | unknown                 |
| Fiji                             | 3    | 0        | unknown                                                                                                                                                    | unknown                            | unknown                              | unknown                 |
| France                           | 1    | 0        | unknown                                                                                                                                                    | unknown                            | unknown                              | unknown                 |
| Gabon                            | 10   | 1        | unknown                                                                                                                                                    | unknown                            | unknown                              | unknown                 |
| Germany                          | 0    | 1        | unknown                                                                                                                                                    | unknown                            | unknown                              | unknown                 |
| Ghana                            | 38   | 2        | unknown                                                                                                                                                    | unknown                            | meat                                 | ingested                |
| Guam                             | 10   | 0        | unknown                                                                                                                                                    | unknown                            | unknown                              | unknown                 |
| Guinea                           | 13   | 0        | unknown                                                                                                                                                    | unknown                            | unknown                              | unknown                 |
| India                            | 114  | 180      | asthma, bed wetting, cold, cough, diarrhea, eyesight, liver enlargement and pain, male sexual performance, pain, rheumatism, strength, tooth pain, unknown | digestive, immune, muscular,       | bones, fluids, nervous, meat, whole, | ingested                |

|                       |     |     |                                                                                                                                                                                                                                                  |                                                                                                                    |                                              |                   |
|-----------------------|-----|-----|--------------------------------------------------------------------------------------------------------------------------------------------------------------------------------------------------------------------------------------------------|--------------------------------------------------------------------------------------------------------------------|----------------------------------------------|-------------------|
|                       |     |     |                                                                                                                                                                                                                                                  | reproductive, respiratory,wings,<br>sensory, skeletal, urinary unknown                                             |                                              |                   |
| Indonesia             | 280 | 103 | allergies, asthma, baldness, chest ailments, cold, corona<br>virus, cough, exhaustion, fever, gout, high blood pressure,<br>itching, kidney conditions, malaise, paralysis, postpartum<br>care, rheumatism, shortness of breath, stroke, unknown | cardiovascular, immune,<br>integumentary, muscular,<br>nervous, reproductive,<br>respiratory, skeletal,<br>urinary | fluids, heart,<br>meat,<br>unknown,<br>whole | ingested          |
| Iran                  | 0   | 1   | unknown                                                                                                                                                                                                                                          | unknown                                                                                                            | unknown                                      | unknown           |
| Iraq                  | 0   | 1   | unknown                                                                                                                                                                                                                                          | unknown                                                                                                            | unknown                                      | unknown           |
| Japan                 | 1   | 0   | unknown                                                                                                                                                                                                                                          | unknown                                                                                                            | unknown                                      | unknown           |
| Jordan                | 0   | 1   | unknown                                                                                                                                                                                                                                          | unknown                                                                                                            | unknown                                      | unknown           |
| Kenya                 | 1   | 0   | unknown                                                                                                                                                                                                                                          | unknown                                                                                                            | unknown                                      | unknown           |
| Kuwait                | 0   | 1   | unknown                                                                                                                                                                                                                                          | unknown                                                                                                            | unknown                                      | unknown           |
| Laos                  | 15  | 0   | unknown                                                                                                                                                                                                                                          | unknown                                                                                                            | unknown                                      | unknown           |
| Liberia               | 4   | 0   | unknown                                                                                                                                                                                                                                          | unknown                                                                                                            | unknown                                      | unknown           |
| Madagascar            | 125 | 6   | asthma, baldness, cough, whooping cough, unknown                                                                                                                                                                                                 | integumentary, respiratory                                                                                         | fluids,<br>unknown                           | ingested, topical |
| Malawi                | 1   | 0   | unknown                                                                                                                                                                                                                                          | unknown                                                                                                            | unknown                                      | unknown           |
| Malaysia              | 16  | 6   | asthma, baldness. kidney conditions, malaise, paralysis,<br>stroke, unknown                                                                                                                                                                      | integumentary, nervous,<br>respiratory, urinary                                                                    | fluids, meat,<br>unknown                     | ingested          |
| Mali                  | 3   | 0   | unknown                                                                                                                                                                                                                                          | unknown                                                                                                            | unknown                                      | unknown           |
| Morocco               | 0   | 1   | unknown                                                                                                                                                                                                                                          | unknown                                                                                                            | unknown                                      | unknown           |
| Mozambique            | 2   | 0   | unknown                                                                                                                                                                                                                                          | unknown                                                                                                            | unknown                                      | unknown           |
| Myanmar               | 6   | 0   | unknown                                                                                                                                                                                                                                          | unknown                                                                                                            | unknown                                      | unknown           |
| Nepal                 | 20  | 13  | asthma, illnesses, knee pain, paralysis, unknown                                                                                                                                                                                                 | immune, nervous,<br>respiratory, skeletal                                                                          | fluids,<br>unknown                           | unknown           |
| New Caledonia         | 3   | 0   | unknown                                                                                                                                                                                                                                          | unknown                                                                                                            | unknown                                      | unknown           |
| Nigeria               | 6   | 6   | baldness, fertility                                                                                                                                                                                                                              | integumentary,<br>reproductive                                                                                     | unknown                                      | unknown           |
| Niue                  | 2   | 1   | unknown                                                                                                                                                                                                                                          | unknown                                                                                                            | unknown                                      | unknown           |
| Oman                  | 0   | 1   | unknown                                                                                                                                                                                                                                          | unknown                                                                                                            | unknown                                      | unknown           |
| Pakistan              | 3   | 9   | pain                                                                                                                                                                                                                                             | nervous                                                                                                            | fluids                                       | ingested          |
| Palau                 | 51  | 1   | beauty                                                                                                                                                                                                                                           | integumentary                                                                                                      | unknown                                      | ingested          |
| Papua New Guinea      | 12  | 0   | unknown                                                                                                                                                                                                                                          | unknown                                                                                                            | unknown                                      | unknown           |
| Philippines           | 161 | 3   | unknown                                                                                                                                                                                                                                          | unknown                                                                                                            | meat                                         | unknown           |
| Republic of Mauritius | 2   | 0   | unknown                                                                                                                                                                                                                                          | unknown                                                                                                            | unknown                                      | unknown           |
| Republic of the Congo | 13  | 0   | unknown                                                                                                                                                                                                                                          | unknown                                                                                                            | unknown                                      | unknown           |
| Samoa                 | 3   | 0   | unknown                                                                                                                                                                                                                                          | unknown                                                                                                            | unknown                                      | unknown           |
| Samoa                 | 1   | 0   | unknown                                                                                                                                                                                                                                          | unknown                                                                                                            | unknown                                      | unknown           |
| São Tomé and Príncipe | 4   | 0   | unknown                                                                                                                                                                                                                                          | unknown                                                                                                            | unknown                                      | unknown           |
| Saudi Arabia          | 0   | 1   | unknown                                                                                                                                                                                                                                          | unknown                                                                                                            | unknown                                      | unknown           |
| Senegal               | 1   | 0   | unknown                                                                                                                                                                                                                                          | unknown                                                                                                            | unknown                                      | unknown           |

|                      |    |    |                                                        |                      |                               |          |
|----------------------|----|----|--------------------------------------------------------|----------------------|-------------------------------|----------|
| Seychelles           | 13 | 0  | unknown                                                | unknown              | unknown                       | unknown  |
| Sierra Leone         | 1  | 0  | unknown                                                | unknown              | unknown                       | unknown  |
| Solomon Islands      | 17 | 0  | unknown                                                | unknown              | unknown                       | unknown  |
| South Africa         | 2  | 0  | unknown                                                | unknown              | unknown                       | unknown  |
| South Korea          | 1  | 0  | unknown                                                | unknown              | unknown                       | unknown  |
| Sri Lanka            | 6  | 41 | unknown                                                | unknown              | unknown                       | unknown  |
| Taiwan               | 3  | 0  | unknown                                                | unknown              | unknown                       | unknown  |
| Tanzania             | 11 | 0  | unknown                                                | unknown              | unknown                       | unknown  |
| Thailand             | 36 | 11 | asthma, energy, male sexual performance, pain, unknown | nervous, respiratory | reproductive, fluids, unknown | ingested |
| Timor                | 1  | 0  | unknown                                                | unknown              | unknown                       | unknown  |
| Togo                 | 3  | 0  | unknown                                                | unknown              | unknown                       | unknown  |
| Tonga                | 2  | 0  | unknown                                                | unknown              | unknown                       | unknown  |
| Uganda               | 5  | 0  | unknown                                                | unknown              | unknown                       | unknown  |
| UK                   | 1  | 0  | unknown                                                | unknown              | unknown                       | unknown  |
| United Arab Emirates | 0  | 3  | hair removal                                           | integumentary        | fluids                        | topical  |
| United States        | 2  | 1  | unknown                                                | unknown              | unknown                       | unknown  |
| Vanuatu              | 8  | 0  | unknown                                                | unknown              | unknown                       | unknown  |
| Vietnam              | 12 | 1  | unknown                                                | unknown              | unknown                       | unknown  |
| Zambia               | 2  | 0  | unknown                                                | unknown              | unknown                       | unknown  |
